1    **The RNA binding protein DAZL functions as repressor**  
2           **and activator of maternal mRNA translation during**  
3                   **oocyte maturation**

4    Cai-Rong Yang<sup>1,2,3</sup>, Gabriel Rajkovic<sup>1,2,3</sup>, Enrico Maria Daldello<sup>1,2,3</sup>, Xuan G. Luong<sup>1,2,3</sup>,  
5                   Jing Chen<sup>1,2,3</sup>, Marco Conti<sup>1,2,3</sup>

6    <sup>1</sup> Center for Reproductive Sciences, University of California, San Francisco, CA 94143, USA

7    <sup>2</sup> USA Eli and Edythe Broad Center of Regeneration Medicine and Stem Cell Research, University of California, San  
8    Francisco, CA 94143, USA

9    <sup>3</sup> Department of Obstetrics and Gynecology and Reproductive Sciences, University of California, San Francisco, CA  
10   94143, USA.

11

12

13

14

15

16    ***Address for correspondence:***

17    Marco Conti

18    513 Parnassus Ave, Box 0556

19    San Francisco, CA 94143

20    Phone: (415)476-2695

21    FAX (415) 502-7866

22    Email: [contim@obgyn.ucsf.edu](mailto:contim@obgyn.ucsf.edu)

23

24

25

26    ***Keywords***

27    DAZL, maternal mRNA, translation, activator, repressor

28 **Abstract**

29 Deleted in azoospermia like (DAZL) is an RNA-binding protein playing critical function during  
30 gamete development. In fully-grown oocytes, DAZL protein is detected in prophase and levels  
31 increase four to five fold during reentry into the meiotic cell cycle. Here, we have investigated the  
32 functional significance of this DAZL accumulation in maturing oocytes. Oocyte depletion of DAZL  
33 prevents progression to MII. This maturation block is associated with widespread disruption in the  
34 pattern of maternal transcripts loading on ribosomes and their translation measured using a  
35 RiboTag IP/RNASeq or qPCR strategy. In addition to decreased ribosome loading of a subset of  
36 transcripts, we found that DAZL depletion causes also translational activation of distinct subset of  
37 mRNAs. DAZL binds to mRNAs whose translation is both repressed and activated during oocyte  
38 maturation. Unexpectedly, DAZL depletion also causes increased ribosome loading of a subset  
39 of mRNAs in quiescent GV-arrested oocytes. This dual role of repression and activation is  
40 recapitulated by using YFP reporters including the 3'UTR of DAZL targets. Injection of  
41 recombinant DAZL protein in DAZL-depleted oocytes rescues the translation of these targets as  
42 well as maturation to MII. Mutagenesis of putative DAZL-binding sites in these candidate mRNAs  
43 mimics the effect of DAZL depletion. These findings demonstrate that DAZL regulates translation  
44 of maternal mRNAs in mature oocytes, functioning both as translational repressor and activator.

45

46

## 47 **Introduction**

48 In both males and females of most species, production of gametes is a developmental process  
49 that spans embryonic, fetal, and postnatal life and is essential for the transfer of genetic  
50 information to the progeny<sup>1</sup>. Germline lineage specification, expansion of the gamete precursors  
51 (PGCs), meiosis, and terminal differentiation into functional gametes are all elaborate processes  
52 that require extensive regulation of gene expression<sup>1, 2</sup>. Together with unique transcriptional and  
53 epigenetic mechanisms, regulation of translation plays a critical role in differentiation of these  
54 germ cells<sup>3, 4, 5</sup>.

55 In a mature mRNA, several domains play a critical role in the regulation of translational efficiency  
56 and stability<sup>6</sup>. These include the CAP region of the mRNA, the 5' and 3' UTR, and the poly(A) tail<sup>6</sup>  
57 <sup>7, 8</sup>. Translation of an mRNA is modulated through the interaction of numerous proteins with these  
58 domains of a mRNA. Indeed the assembly of ribonucleoprotein (RNPs) modulates every aspect  
59 of mRNA translation and stability. A subgroup of RNA-binding protein (RBPs) interacts with the  
60 3'UTR of an mRNA. These RBPs participate in the formation of RNPs that are critical for the  
61 control of translational efficiency, stability and localization of the mRNAs<sup>9</sup>. These properties place  
62 these RBPs in a critical role in the control of protein synthesis. Among the several RBPs uniquely  
63 expressed in the germ line is the family of the Daz RNA-binding proteins<sup>10, 11</sup>. DAZ, DAZL and  
64 BOULE are germ-cell specific RBPs essential for gametogenesis from worms to humans<sup>11</sup>.

65 DAZL KO prevents differentiation of PGCs<sup>10, 12, 13</sup>. It has been proposed that DAZL functions as a  
66 translational activator by recruiting poly(A) binding proteins, which in turn promotes and stabilize  
67 interaction with the cap of mRNA, a loop conformation thought to promote stability and  
68 translational efficiency<sup>14</sup>. However, additional studies in PGCs suggest a repressive function for  
69 this RBP in the control of zebrafish embryogenesis and in the mouse<sup>15, 16</sup>. Moreover, depletion of  
70 DAZL during spermatogenesis has been associated with mRNA destabilization<sup>17</sup>.

71 We have previously reported that acute depletion of DAZL from fully grown mouse oocytes using  
72 morpholino oligonucleotides causes disruption of the progression through meiosis<sup>18, 19</sup>. Here we  
73 have used this *in vitro* model to define the pattern of translation dependent on the function of this  
74 RBP. We find that DAZL depletion causes both increases and decreases in translational efficiency  
75 of a wide range of transcripts expressed in the oocyte and these effects are reversible and  
76 recapitulated by regulation of reporter translation of candidate DAZL targets.

77

## 78 **Results**

### 79 ***DAZL is expressed in fully grown oocytes and is depleted upon inhibition of DAZL*** 80 ***mRNA translation***

81 We have reported that DAZL protein is detectable in fully grown GV-arrested oocytes with protein  
82 levels increasing further up to MII<sup>18</sup>. This finding is at odd with data of others where DAZL protein  
83 was only borderline detectable or could not be detected<sup>20, 21</sup>. Here, we have re-evaluated the  
84 expression of DAZL during oocyte maturation using a newly developed monoclonal DAZL  
85 antibody (see 'Materials and Methods'). Western blot analysis of extracts from oocytes at different  
86 stages of maturation (0, 2, 4, 6, 8hrs) reveals an immunoreactive polypeptide with mobility  
87 corresponding to that of DAZL (37 kDa) in GV oocytes, and a three-to-fourfold increase in protein  
88 levels up to 8 hrs of *in vitro* maturation (MI) (Fig.1a, Supplementary Fig. 1e), in complete  
89 agreement with our previous reports using *in vivo* matured oocytes. Note that the identity of the  
90 immunoreactive band is further confirmed by morpholino knockdown experiments (see Fig.1b,  
91 Supplementary Fig. 1f). Thus, two different antibodies document that DAZL is expressed in GV  
92 oocytes and that accumulation of the protein increases with maturation, conclusions consistent  
93 with our *Dazl* mRNA translation data with *in vivo* and *in vitro* matured oocytes (Supplementary  
94 Fig.1a, b, c).

95 To determine whether preventing *Dazl* mRNA translation effectively depletes the oocytes of the  
96 DAZL protein, GV-arrested oocytes from RiboTag<sup>fl/fl</sup>: Zp3-CRE, *Dazl*<sup>+/+</sup> or *Dazl*<sup>+/-</sup> mice were  
97 injected with a scrambled (Con-MO) or DAZL targeting morpholino (DAZL-MO) respectively, to  
98 maximize DAZL protein removal. Blockage of *Dazl* mRNA translation by this specific MO markedly  
99 reduces (94.235% decrease +/- 0.025, Mean +/- SEM, N=3) the endogenous DAZL protein  
100 expression compared to a CON-MO (Fig.1b). To further assess the effectiveness and specificity  
101 of the treatment, we used RiboTag IP/qPCR to evaluate the MO effect on ribosome loading onto  
102 endogenous mRNAs during the transition from germinal vesicle stage (GV) to Meiosis I stage  
103 (MI). We observe a significant decrease in ribosome recruitment onto the *Dazl* mRNA, confirming  
104 the effectiveness of the MO in blocking initiation of translation, with consequent depletion of the  
105 protein from oocytes (Fig. 1c). TEX19.1 is an established target of DAZL<sup>19</sup>. We show that the  
106 *Tex19.1* mRNA loading on ribosomes is significantly decreased after injection of DAZL-MO at the  
107 MI stage (Fig. 1d). Conversely, knockdown of DAZL had no effect on ribosome loading onto the  
108 non-target *CcnB1* (Fig. 1e), which is again consistent with our previous report<sup>18, 19</sup>. No detectable  
109 effect on total transcript levels was detected under these conditions. Confirming what previously

110 reported by us, DAZL depletion disrupts oocyte maturation to MII (see below). Further control  
111 experiments where immunoprecipitation was performed with WT rather than RiboTag mice yield  
112 only background signal, confirming the specificity of the RiboTag immunoprecipitation  
113 (Supplementary Fig.1d). These pilot experiments document that DAZL knockdown specifically  
114 disrupts DAZL target loading onto ribosomes with high selectivity since it does not affect the  
115 translation of *CcnB1*, an mRNA that does not interact with DAZL. Additionally, they confirm that  
116 RiboTag IP in oocytes depleted of DAZL is an effective strategy to assess the role of this RBP in  
117 endogenous maternal mRNA translation.

### 118 ***Ribosome loading onto maternal mRNAs is disrupted in oocytes depleted of DAZL***

119 For a genome-wide analysis of the effect of DAZL depletion on translation of oocyte endogenous  
120 mRNAs, GV oocytes from RiboTag<sup>f/f</sup>: Zp3-CRE, *Dazl*<sup>+/+</sup> or *Dazl*<sup>+/-</sup> mice were injected with Con-  
121 MO or DAZL-MO. After overnight recovery, oocytes were collected at 0 hr (GV) or cultured in  
122 inhibitor-free medium to mature for up to 6 hrs (MI). Although the changes in translation would be  
123 more pronounced if measured in fully matured MII oocytes, this short maturation time was  
124 selected to monitor early effects of DAZL depletion, thus, avoiding the potential confounding  
125 effects of the blockage of maturation to MII, and a potential decrease in oocyte viability. When we  
126 compare total mRNAs from CON-MO and DAZL-MO in GV-arrested oocytes (overnight incubation  
127 in PDE inhibitors), few differences are detected (Fig. 2a). Also comparison of ribosome loading in  
128 the CON-MO at 0 hr and 6 hrs shows changes in ribosome loading qualitative similar to those  
129 reported previously with polysome array or other RiboTag IP/RNASeq data sets with non injected  
130 oocytes (Supplementary Fig. 2a). However, when we compare RiboTag IP/RNASeq in the 6 hrs  
131 DAZL-MO versus 6hrs CON-MO group, we observe complex changes in maternal mRNA  
132 ribosome loading (Fig. 2b). Ribosome loading onto the majority of transcripts present in the oocyte  
133 is not significantly affected by the DAZL depletion (grey dots in Fig. 2b). However, we detect a  
134 decrease in ribosome loading onto a group of transcripts (blue dots in Fig. 2b, 551 transcripts,  
135 FDR < 0.05), a finding consistent with the theory that DAZL functions as a translational activator.  
136 Surprisingly, we also identify a group of transcripts whose translation increases (red dots in Fig.  
137 2b, 170 transcripts, FDR < 0.05) after DAZL removal. This latter finding indicates that directly or  
138 indirectly DAZL has a role in repression of translation. As an example of the RNASeq data,  
139 ribosome loading onto *Tex19.1*, *Txnip*, *Akap10*, and *Nsf* mRNAs at 0 hr and 6 hrs of maturation  
140 are reported in Fig. 2d, 2e. These mRNAs are significantly immunoprecipitated by DAZL antibody  
141 as shown in our DAZL RIP-Chip dataset (Fig. 2c). We found no clear pattern in the changes in  
142 total mRNA levels after DAZL depletion (Fig. 2d). RiboTag IP/RNA-Seq shows an increase in

143 ribosome loading (HA immunoprecipitation) for transcripts *Tex19.1* and *Txnip* during maturation  
144 in CON-MO injected oocytes, whereas the recruitment is blunted after DAZL KD in MI stage(Fig.  
145 2e). Conversely, ribosome loading onto *Akap10* and *Nsf* mRNAs is increased after DAZL  
146 depletion (Fig. 2e). These data provide an initial indication that that DAZL functions not only a  
147 translational activator, but also a translational repressor during the GV-to-MI transition. Given the  
148 fact that no significant differences in total mRNA were detected between the CON-MO and DAZL-  
149 MO groups, calculation of the translational efficiency (HA-IP:input ratio) shows the same trend  
150 (Supplementary Fig. 2b).

### 151 ***The dual effect of DAZL depletion is confirmed by RiboTag IP/qPCR***

152 To confirm the opposing effect of DAZL depletion on translation, we performed RiboTag IP/qPCR  
153 with independent biological samples to monitor the recruitment of representative transcripts to the  
154 ribosome/translation pool. GV stage oocytes from wild type or DAZL Heterozygous mice were  
155 injected with control or DAZL MO. After overnight preincubation with 2  $\mu$ M milrinone, oocytes were  
156 cultured in inhibitor-free medium. Oocytes were collected at 6 hrs for RiboTag IP /qPCR analysis.  
157 This RNA quantification confirms that the overall transcripts levels (input of RiboTag IP/qPCR)  
158 are not affected, including transcripts coding for *Dazl*, *Tex19.1*, *Txnip*, *Rad51C*, *Btg4*, *Ero1*,  
159 *Oosp1*, *Obox5*, *Ireb2*, and *Tcl1* (Supplementary Fig. 3a). However, RiboTag IP/qPCR shows a  
160 decrease translation for several candidates after DAZL removal, similar to that observed with the  
161 RiboTag IP/RNASeq (Fig. 3a, c). *Dppa3* and *CcnB1* are used as negative control, as they are not  
162 regulated by DAZL during oocyte maturation<sup>18, 19</sup>. Conversely, translation of transcripts coding  
163 for *Akap10*, *Cenpe*, *Nsf*, *Ywhaz*, *Nin*, and *YTHDF3* is upregulated after DAZL removal (Fig. 3b,  
164 d), while the overall transcripts levels are not changed (Supplementary Fig. 3b). *Gdf9*, used as  
165 negative control, is not affected by DAZL depletion. These results not only confirm our RiboTag  
166 IP/RNASeq data, but also indicate that DAZL may plays dual function (both translational activator  
167 and repressor) during oocyte maturation.

### 168 ***DAZL physically interacts with transcripts whose translation is upregulated or*** 169 ***downregulated after DAZL removal***

170 The above findings open the possibility that DAZL binding to maternal mRNA leads to both  
171 increase and decrease in translation. If these were correct, DAZL should bind to maternal mRNAs  
172 whose translation is upregulated or downregulated during oocyte maturation. To test this  
173 hypothesis, we analyzed a previously generated DAZL RIP-Chip dataset. In this DAZL RIP-Chip  
174 dataset, 811 transcripts are significantly immunoprecipitated (> 1.5 fold enrichment as compared

175 to IgG) by DAZL antibodies during the GV to MII transition. A scatter plot (Fig. 4a) of these data  
176 shows DAZL binding to both upregulated transcripts and downregulated transcripts, a finding  
177 consistent with the two classes distribution of the ribosome loading transcripts (Supplementary  
178 Fig 2 a). This analysis is again consistent with the hypothesis that DAZL interacts with both  
179 classes of transcripts whose translation may increase or decrease during oocyte maturation. A  
180 more quantitative comparison of the mRNA immunoprecipitated by DAZL antibody and the  
181 transcripts whose translation is affected by DAZL depletion shows that 212 downregulated and  
182 49 upregulated (total 251) transcripts are also immunoprecipitated by DAZL antibodies. A sizable  
183 number of transcripts (215) are not affected or changes do not reach statistical significance  
184 (Supplementary Fig. 4).

185 We wished to next confirm that transcripts whose translation increases after DAZL depletion are  
186 indeed direct target of DAZL. Because no sufficient signal could be obtained in DAZL RIP when  
187 using 200 oocytes with currently available antibodies, we used mouse embryonic stem cells (ES)  
188 for DAZL RIP. It is established that ES cells in the ground state express DAZL as well as a large  
189 number of two-cell embryo transcripts, mRNAs often expressed also in oocytes<sup>15, 22 23</sup>. ES cells  
190 were cultured in DMEM medium +2i and collected for DAZL IP/qPCR analysis. The results are  
191 normalized to the IgG IP. This DAZL RIP experiment in ES cells shows that transcripts of *Dazl*,  
192 *Tex19.1*, *Txnip*, *Rad51C*, *Btg4*, *Ero1lb*, *Ireb2*, and *Tcl1b* (Fig. 4B, red), whose translation is  
193 downregulated by DAZL removal, and transcripts of *Akap10*, *Nsf*, *Ywhaz*, *Nin*, and *YTHDF3*,  
194 whose translation is upregulated by DAZL removal (Fig. 4b, blue), are all specifically  
195 immunoprecipitated by DAZL antibody (Fig. 4b). However, *Cenpe*, a transcript whose translation  
196 is upregulated by DAZL removal, could not be immunoprecipitated by the DAZL antibody,  
197 suggesting that DAZL may also act as a translational repressor through an indirect pathway.  
198 Nevertheless, most of the transcripts whose translation increases/decreases after DAZL depletion  
199 are directly interacting with DAZL in oocytes and ES cells.

200 ***The 3' UTR of representative transcripts Oosp1 and Obox5 recapitulates the effect***  
201 ***of DAZL depletion on translational activation.***

202 *Oosp1* and *Obox5* are two oocyte-specific transcripts whose translation is affected by DAZL  
203 removal as determined in both the RiboTag IP/RNA-Seq dataset and in the RiboTag IP/qPCR  
204 validation. OOSP1 (oocyte secreted protein 1) was initially identified as a novel oocyte-secreted  
205 protein<sup>24</sup>. OBOX5 (oocyte specific homeobox 5) is a member of the Obox family of proteins but  
206 its function is unclear<sup>25</sup>. These mRNAs were chosen because of their robust translational



207 activation in meiosis and their relatively simple 3'UTR. To verify the effect of DAZL on translation  
208 of these two candidate mRNAs, a YFP reporter was fused to the *Oosp1* or *Obox5* 3'UTR and  
209 these constructs were injected in oocytes together with either Con MO or DAZL MO. A fully  
210 polyadenylated *mCherry* reporter was used as a control of the volume injected. The accumulation  
211 of YFP and mCherry in individual oocytes was recorded throughout meiotic maturation and YFP  
212 signals were corrected by the level of co-injected mCherry signal. Data are expressed as changes  
213 over 0 hr (GV stage), as differences in reporter accumulation were detected in GV-arrested  
214 oocytes (see below). By measuring the average YFP signals throughout maturation, the  
215 accumulation of *YFP-Oosp1* and *YFP-Obox5* reporter in CON-MO group closely follows the  
216 corresponding ribosome loading onto the endogenous mRNA; however, DAZL depletion causes  
217 at least 50% decrease in translation in *Oosp1* and *Obox5* reporter during oocyte maturation (Fig.  
218 5a, c). We further assessed the rates of translation during oocyte maturation of the two reporters  
219 by fitting the YFP/mCherry data during GV (0-2 hrs) and after GVBD (4-8 hrs) (Fig. 5b, d). We  
220 found a significantly decrease of *Oosp1* ( $p<0.0001$ ) and *Obox5* ( $p<0.0001$ ) translation rates in  
221 DAZL MO injected oocytes (Fig. 5b, d), confirming that DAZL depletion decreases the translation  
222 of these reporters during oocyte maturation. Consistent with our RiboTag IP/RNASeq data and  
223 translational efficiency of *Oosp1* and *Obox5* is affected by DAZL depletion (Supplementary Fig.  
224 5). *Ccnb1* 3'UTR co-injected with either CON-MO or DAZL-MO shows no obvious changes in  
225 translational accumulation between the two groups, confirming the selective effect of the DAZL  
226 depletion (Fig. 5e, f).

227 To confirm that the depletion of DAZL protein with the specific MO is the sole cause of the  
228 decreased translation of the reporter, we performed the following rescue experiment. A human  
229 recombinant DAZL protein was injected together with the DAZL MO and the *Oosp1* reporter. As  
230 observed above, DAZL depletion causes a decrease in the rate of translation of the *Oosp1*  
231 reporter. This decrease is completely rescued when the recombinant DAZL protein is coinjected  
232 with the DAZL MO (Fig. 6a, b). The rescue effect of the DAZL protein was not limited to the  
233 translation efficiency. As previously reported, DAZL depletion on a het background almost  
234 completely prevents oocyte maturation to MII (Control MO 69.7 % vs DAZL MO:7%). Conversely,  
235 when the DAZL MO is co-injected with a recombinant DAZL protein, oocytes complete maturation  
236 to MII at a rate (63%) similar to control injected oocytes (Fig. 6c). Taken together with the RiboTag  
237 IP / RNA-Seq and qPCR data (Fig. 2, Fig. 3), the reporter measurements further support the  
238 conclusion that the DAZL protein plays a role in the translational activation of these two target



239 mRNAs, that their 3'UTR mediates the effect of this RBP on translation, and that DAZL depletion  
240 is the cause of decreased translation.

241 ***DAZL depletion increases the translation of Oosp1 and Obox5 mRNAs in GV-***  
242 ***arrested oocytes***

243 In the above experiments on reporter translation, we consistently observed that translation of both  
244 reporters during the first two hours of incubation, when the oocytes are still GV-arrested, is  
245 significantly increased in the DAZL-MO injected group (*Oosp1*:  $p < 0.0001$  and *Obox5*  $p = 0.0007$ )  
246 (Fig. 7b, d). To verify this apparent de-repression in DAZL-depleted, quiescent oocytes, we  
247 reanalyzed the RiboTag IP/RNASeq data sets. We found that ribosome loading on both *Obox5*  
248 and *Oosp1* during GV-arrested is also increased in this dataset (Supplementary Fig. 6). To  
249 remove any possible bias due to variation in the total mRNA, we next calculated the translational  
250 efficiency (TE) of these two transcripts after DAZL depletion. Indeed, the TEs for *Oosp1* and  
251 *Obox5* are significantly increased in GV oocytes depleted of DAZL (Fig. 7a, b), whereas the  
252 *CcnB1* translation is not affected (Fig. 7e) To assess whether this effect of DAZL depletion is  
253 widespread, we reanalyzed the RiboTag IP RNASeq data and found that ribosome loading of  
254 approximately 70 transcripts is significantly increased after DAZL removal in GV oocytes (69,  
255 Supplementary Fig. 6 red,  $FDR < 0.05$ ). This latter finding provides further evidence for a  
256 repressive role of DAZL prior to meiotic resumption.

257 ***Efficient translation of Oosp1 and Obox5 reporters requires the presence of DAZL***  
258 ***binding element.***

259 Collectively, the above experiments strongly indicate a translational regulation of the *Oosp1* and  
260 *Obox5* transcripts are affected by DAZL MO injection during GV to MI transition. To test whether  
261 this effect is due to binding of DAZL to these target mRNAs, we mutated the consensus putative  
262 DAZL-binding sites (UU[G/C]UU) by replacing critical nucleotides with adenosine in *Oosp1* 3'UTR  
263 or *Obox5* 3'UTR. We have previously shown that this mutations disrupts DAZL binding<sup>19, 26</sup>. A  
264 schematic representation of *Oosp1* and *Obox5* 3'UTR with mutant DAZL binding sequence is  
265 reported in Fig. 8a. When YFP reporter tagged with mutant *Oosp1* 3'UTR or *Obox5* 3'UTR YFP  
266 reporters were injected in oocytes and their rate of translation were monitored during maturation,  
267 mutation of a single DAZL-binding site in either *Oosp1* or *Obox5* 3'UTR is sufficient to significantly  
268 decrease the rate of reporter accumulation (Fig. 8c, d, f, g) during meiotic resumption. Of note,  
269 mutation of DAZL binding site of *Oosp1* (Fig. 8b) or *Obox5* (Fig. 8e) also cause an increase  
270 translation in GV stage oocyte as compared to wildtype reporters. This increased rate of

271 translation of the reporter was confirmed in a different experimental paradigm where control and  
272 DAZL depleted oocytes are maintained in GV stage. Also under these conditions, the translation  
273 rate of the *Oosp1* reporter is increased, whereas the *CcnB1* mRNA is not affected (Supplementary  
274 Fig. 7) This latter finding is consistent with the results of DAZL MO of the RiboTag IP/RNASeq  
275 experiment (Fig. 7a, c), confirming that DAZL functions as translational repressor also in GV-  
276 arrested oocyte.

## 277 **Discussion**

278 With the experiments described above, we provide evidence that the RNA-binding protein DAZL  
279 plays a function in fully-grown oocytes by shaping the pattern of maternal mRNA translation at  
280 this critical transition of gametogenesis. Our data document that DAZL has both inhibitory, and  
281 stimulatory, effects on translation in quiescent oocytes as well as during meiotic resumption. This  
282 dual function parallels that of CPEB1, which is considered to be the master regulator of translation  
283 in oocytes, and reinforces the concept that DAZL cooperates with CPEB to repress and active  
284 translation of maternal mRNAs. Given the finding that DAZL-MO treatment prevents progression  
285 through meiosis, it is proposed that the DAZL function is essential for oocyte maturation.

286 Several lines of evidence support the conclusion that DAZL is expressed and functional at the  
287 end of oogenesis in fully grown mouse oocytes. The mRNA coding for DAZL is expressed at high  
288 levels in fully-grown MII oocytes<sup>18</sup>. RiboTag IP/RNASeq data confirmed by qPCR document that  
289 the *Dazl* mRNA is actively translated and translation increases during oocyte maturation. In line  
290 with mRNA ribosome loading, DAZL protein is detected by Western blot with two distinct  
291 antibodies. The progressive increase in the DAZL protein during maturation is consistent with the  
292 increase in translation, further strengthening the view that this RBP accumulates during oocyte  
293 maturation. Finally, the RIP-Chip data document that the DAZL is actively interacting with  
294 hundreds of maternal mRNAs. All these independent pieces of evidence strongly support the  
295 hypothesis of expression and function if this RBP at the final stage of oogenesis.

296 The function of DAZL in translation is further confirmed by a loss-of-function approach. Morpholino  
297 oligonucleotide interference with mRNA translation was used on a DAZL-heterozygous  
298 background, since homozygous deletion of this gene precludes oocyte development. As detailed  
299 above, we chose to determine the effect of DAZL effect on translation in MI to avoid secondary  
300 effects due to the block in oocyte maturation. Injection of DAZL-MO interrupts *Dazl* mRNA  
301 translation as detected by RiboTag IP/qPCR. In parallel with decreased translation, Western blot  
302 analysis of oocyte extracts shows a reproducible decrease of more than 90% in DAZL protein.

303 The specificity of this treatment is supported by the data showing that ribosome loading onto the  
304 mRNAs for *CcnB1*, *Dppa3* and *Gdf9* is not affected. At the transcriptome level, the overnight  
305 incubation to deplete the DAZL-MO injected oocytes has minimal effect on total transcript levels,  
306 arguing against a generalized disruption of the oocyte viability. All these findings increase  
307 confidence that the KD of DAZL is effective in depleting the oocytes of the DAZL protein and that  
308 its effect is specific.

309 The analysis of the transcriptome in DAZL-depleted oocytes indicates that approximately 800  
310 maternal mRNAs show altered on the level of ribosome loading. Together with the DAZL RIP-  
311 Chip data, this analysis confirms the presence of a large number of maternal mRNA targets for  
312 this RBP. *Tex19.1*, *Txnip*, *Rad51C*, *Btg4*, *Oosp1*, *Obox5*, *Ireb2*, and *Tcl1* are examples of the  
313 more than 200 mRNAs regulated by DAZL on the basis of the decreased ribosome loading after  
314 DAZL depletion and the observation that these mRNAs are immunoprecipitated by DAZL  
315 antibodies. These findings confirm our and others previous observations that *Tex19.1* mRNA is a  
316 DAZL target<sup>19, 27</sup>. TEX19.1 protein accumulates during oocyte maturation and data in the testis  
317 indicate that this protein may be involved in the regulation of transposon expression<sup>28, 29, 30</sup>.  
318 Similarly, DAZL regulation of *Btg4* mRNA translation has been reported by others<sup>31, 32, 33</sup>. In both  
319 mouse and human, *Btg4* transcripts are highly enriched in the ovary and testis. A consequence  
320 of the absence of BTG4 is a global delay in maternal mRNA degradation during the MZT<sup>31, 32, 33</sup>.  
321 <sup>34</sup>. Given the involvement of BTG4 in mRNA destabilization, one would expect that DAZL depletion  
322 would induce mRNA stabilization by preventing Btg4 accumulation. However in our experimental  
323 paradigm, DAZL depletion and consequent decreases in BTG4 accumulation at 6 hrs are  
324 probably not sufficient to produce detectable effect on mRNA stabilization. mRNA destabilization  
325 is detected at 8 hrs of oocyte maturation (data not shown). Finally, it should be noted that  
326 ribosome loading onto all the above listed mRNAs increases during oocyte maturation and most  
327 of the mRNAs also contain at least one putative CPE element in the 3'UTR. Thus, one function  
328 of DAZL is likely to increase the translation of these mRNA during maturation, a function likely  
329 synergistic with that of CPEB, as we have described for *Tex19.1*<sup>19</sup>. This conclusion is supported  
330 by the reporter translation of *YFP-Oosp1* and *YFP-Obox5*. Similarly, the data with the *YFP-*  
331 *CenpE* reporter (Supplementary Fig. 8) are consistent with the view that a group of transcripts,  
332 that include *Akap10*, *Cenpe*, *Nsf*, *Ywhaz*, *Nin*, and *YTHDF3*, are translationally repressed by  
333 DAZL.

334 Our DAZL RIP-Chip data indicates that DAZL interacts with approximately 800 mRNAs expressed  
335 in the oocytes. The interaction of several candidate mRNAs with DAZL was also confirmed in ES

336 cell extracts. Data are available for *Dazl* mRNA targets in the fetal gonad of the mouse and  
337 human. Of the mRNA shown to interact with DAZL in human fetal ovary<sup>35</sup>, *Sycp1* and *Tex11* are  
338 not detected in GV oocytes and the ribosome loading of *Smc1b* although decreased in our data  
339 set does not reach statistical significance. A comparison between the human fetal gonad data<sup>35</sup>  
340 and our mouse RIP data shows overlap in immunoprecipitation of 72 mRNAs including *Trip13*,  
341 *Rad 51*, *Spin1*, *Kit*, and *Arpp19*.

342 One consistent finding is that *Dazl* mRNA is immunoprecipitated with DAZL antibody in both  
343 mouse and human fetal ovary. This finding reinforces the idea that DAZL is involved in an  
344 autoregulatory loop controlling its own translation<sup>18</sup>.

345 Of the mRNAs identified in the DAZL RIP-Chip, 261 of 476 transcripts are affected by DAZL  
346 depletion (Supplementary Fig. 4). The limited overlap between the transcripts recombined in the  
347 RIP and in the RiboTag IP/RNaseq is in part due to the differences in annotation of the two  
348 platforms (300 genes not shared) or to the different filtering of the data. Our numbers are also  
349 considerably lower than those reported by Zagore et al. using HITS-CLIP with testis extracts<sup>17</sup>.  
350 This latter difference may be due to the fact that we did not use crosslinking for our experiment  
351 but also to the fact that very low amounts of cell protein is available from the oocyte. Thus, the  
352 affinity of the antibody for DAZL becomes limiting. Similar to the finding of Zagore et al.<sup>17</sup>, we find  
353 that about 200 mRNAs that bind DAZL are not affected by DAZL depletion. This discrepancy  
354 again can be due to filtering of the data and the cutoffs imposed. Also, we should point out that in  
355 our experimental paradigm, we are measuring acute effects of DAZL depletion and if longer  
356 incubation times are used the number of mRNAs affected would increase substantially.

357 A previous report in the testis proposes that DAZL is involved in mRNA stabilization<sup>17, 36, 37, 38</sup>.  
358 Therefore it is possible that DAZL depletion affects translation indirectly by destabilizing mRNAs.  
359 However, overnight depletion of DAZL has minimal effects on the oocyte transcriptome, lessening  
360 the possibility of destabilizing effects on maternal mRNAs. Moreover, all the data of the  
361 candidates we more thoroughly investigated are inconsistent with the destabilization hypothesis,  
362 as we cannot detect a decrease in total mRNA. Therefore, the decreased translation for these  
363 candidate DAZL targets is not due to destabilization of these mRNAs. Moreover, many of the  
364 effects of DAZL depletion on translation continue to be present when the TE is calculated,  
365 indicating that mRNA stabilization is not a factor in ribosome loading. However, the timeframe of  
366 our experiments is considerably short and we cannot exclude that longer time causes of DAZL  
367 depletion uncovers effects of DAZL depletion on mRNA stability.

368 Recently, it has been reported that DAZL is dispensable for oocyte maturation, but that instead  
369 its overexpression has deleterious effects on oocyte developmental competence<sup>20</sup>. This  
370 conclusion is based on the observation that DAZL protein is markedly decreased in adult ovary in  
371 comparison with neonatal ovary; however, the variable ratio somatic:germ cells in the gonad  
372 during development may account, at least in part, for these differences<sup>20</sup>. Our data on DAZL  
373 protein expression detected with two distinct antibodies, the RIP-Chip data, and the translational  
374 regulations described confirm the expression and increased accumulation of DAZL in the final  
375 stages of oocyte development. Genetic manipulations also led to the conclusion that the absence  
376 of DAZL does not produce overt phenotypes on oocyte maturation or fertility. The genetic  
377 background used in these experiments is a mixed background (ICR and C57BL/6N) while we use  
378 a pure C57 BL/6 background. It has been noted that the penetrance of the phenotypes associated  
379 with *Dazl* gene ablation are sensitive to the mouse background used<sup>12</sup>. However, the view that a  
380 DAZL needs to be expressed within a very narrow range of concentrations is consistent with our  
381 findings that DAZL has a dual effect on translation, functioning both as a repressor and activator.  
382 Therefore, it is possible that increased DAZL levels favors translational repression that would be  
383 detrimental to developmental competence. Aside from the genetic background of the mice used,  
384 not immediately evident is the explanation of why *Dazl* KO in neonatal oocytes produces no  
385 detectable phenotype on fertility. Possible off-target effects of DAZL morpholinos are inconsistent  
386 with the rescue experiments we have performed. In several cases, it has been observed that  
387 morpholino oligonucleotide treatment is associated with induction of *p53*<sup>39, 40</sup>(*tp53* or *trp53*) or  
388 interferon response or toll like receptor<sup>41</sup>. Since transcription is repressed in GV oocytes, it is  
389 unlikely that MO off-target effects include changes in transcription. However, we noticed that *trp53*  
390 mRNA becomes associated with ribosome during oocyte maturation and is immunoprecipitated  
391 with DAZL antibody. We could not detect clear effects of DAZL depletion on *trp53* mRNA  
392 translation. Another possible explanation of the divergent observations is that the oocyte does not  
393 tolerate acute depletion of DAZL, while it has time to adjust to loss of DAZL during the follicle  
394 growth phase that starts in the neonate ovary. Genetic compensation has been shown to be at  
395 the basis of differences in phenotypes produced by mutations but not knockdowns<sup>42</sup>. Since we  
396 have shown that DAZL functions in partnership with CPEB<sup>19</sup>, it is possible that this latter RBP  
397 would compensate for the loss of DAZL. In this respect, it would be important to determine  
398 whether CPEB expression is affected in the DAZL KO and how the translational program is  
399 executed in the absence of DAZL in the fully grown oocyte.

400 Several scenarios may explain the dual repression/activation role of DAZL on translation. One  
401 possibility is that DAZL assembles different molecular complexes in GV-arrested and MI oocytes.  
402 DAZL has been shown to interact with PUM2 forming a translational repressor complex on the  
403 *Ringo/Spy* mRNA<sup>43</sup>. During maturation, the complex is dissociated leading to translational  
404 activation. Thus, one could envisage that DAZL is part of a repressive complex in mouse GV-  
405 arrested oocytes and contributes to an activating complex in MI stage oocytes. This scenario is  
406 reminiscent of the CPEB1 mode of action<sup>8, 44</sup>. We have observed that the DAZL protein shifts in  
407 mobility on SDS/PAGE during oocyte maturation, suggesting that the protein becomes post-  
408 translationally modified during maturation. Finally, it should be considered that the concentration  
409 of DAZL protein increases up to six fold during oocyte maturation. Thus, it may be possible that  
410 low loading on an mRNA is sufficient to repress translation, whereas loading of multiple DAZL  
411 proteins on a mRNA leads to activation of translation. Indeed, we and others have proposed that  
412 the number of loaded DAZL synergizes in activation of translation<sup>14, 18</sup>.

413 In summary, our findings are consistent with a role of DAZL in the translation program executed  
414 during the final stages of oocyte maturation. The dual function as repressor and activator suggests  
415 that complex changes in the proteome in fully grown oocytes and during maturation are  
416 dependent on DAZL action. These findings imply that spontaneous DAZL mutations found in  
417 human may affect not only germ cell development in the fetal gonad but they also have an effect  
418 on oocyte quality. Such a possibility has been proposed with the description of missense  
419 mutations in infertile women<sup>45</sup>.

420

## 421 ***Materials and Methods***

### 422 ***Experimental animals***

423 All experimental procedures involving animal models used were approved by the Institutional  
424 Animal Care and Use Committee of the University of California at San Francisco (protocol  
425 AN101432). Pure C57BL/6 female mice (21-24 days old) carrying the DAZL TM1<sup>Hgu</sup> allele ( $\Delta$ DAZL)  
426 were generated as previously described<sup>18, 19</sup>. Rpl22tm1.1Psam/J (RiboTag) mice, with a targeted  
427 mutation that provides conditional expression of the ribosomal protein L22 tagged with three  
428 copies of the HA epitope. Rpl22tm1.1Psam/J homozygous males were crossed with C57BL/6-  
429 TgN (Zp3-cre) 82Knw (Jackson Laboratories) females to produce C57BL/6-Zp3cre-  
430 Rpl22tm1.1Psam (Zp3cre-RiboTag) mice. For breeding Zp3RiboTagDazl<sup>+/+</sup> or Zp3RiboTagDazl<sup>+/-</sup>



431 , C57BL/6-Zp3cre- RiboTag wild type or homozygous males were crossed with C57BL/6- RiboTag  
432 wild type or heterozygous  $\Delta$ DAZL females to obtain C57BL/6- $\Delta$ DAZL-ZP3cre-RiboTag mice.

### 433 ***Oocyte collection and microinjection***

434 Oocyte isolation and microinjection were performed using HEPES modified minimum essential  
435 medium Eagle (Sigma-Aldrich, M2645) supplemented with 0.23 mM pyruvate, 75  $\mu$ g/mL penicillin,  
436 10  $\mu$ g/mL streptomycin sulfate, and 3mg/mL BSA, and buffered with 26 mM sodium bicarbonate.  
437 To prevent meiosis resumption, 2  $\mu$ M cilostamide (Calbiochem, 231085) was added in the  
438 isolation medium. Oocyte *in vitro* maturation was performed using Eagle's minimum essential  
439 medium with Earle's salts (Gibco, 12561-056) supplemented with 0.23 mM sodium pyruvate, 1%  
440 streptomycin sulfate and penicillin, and 3mg/mL bovine serum albumin (BSA). For microinjection,  
441 cumulus cells were removed by mouth pipette from isolated cumulus oocyte complexes (COCs)  
442 and denuded oocyte were injected with 5-10 pL of 12.5 ng/ $\mu$ L mRNA reporter using a FemtoJet  
443 Express programmable microinjector with an Automated Inverted Microscope System (Leica,  
444 DM4000B). After washing and pre-incubating overnight in  $\alpha$ -MEM medium supplemented with 2  
445  $\mu$ M cilostamide, oocytes were released in inhibitor-free medium for *in vitro* maturation at 37  $^{\circ}$ C  
446 under 5% CO<sub>2</sub>.

### 447 ***Oocyte morpholino antisense oligonucleotide microinjections***

448 Germinal vesicle (GV) stage oocytes were isolated from wild type (WT) or Dazl Heterozygous  
449 (Dazl<sup>+/-</sup>) mice. After pre-incubated in  $\alpha$ -MEM medium supplemented with 2  $\mu$ M cilostamide for 1hr  
450 at 37 $^{\circ}$ C under 5% CO<sub>2</sub>, 5–10 pl of 1 mM morpholino oligonucleotides (Gene Tools) of standard  
451 control (5'-CCTCTTACCTCAGTTACAATTTATA-3') or against Dazl (5'-  
452 CCTCAGAAGTTGTGGCAGACATGAT-3') were injected into WT or Dazl<sup>+/-</sup> oocytes using a  
453 FemtoJet express microinjector. Following overnight incubation in  $\alpha$ -MEM containing 2  $\mu$ M  
454 cilostamide medium, oocytes were released in  $\alpha$ -MEM medium without inhibitor for *in vitro*  
455 maturation or recording under the microscope.

### 456 ***RiboTag IP RNASeq***

457 Oocytes from RiboTag wild type and Dazl<sup>+/-</sup> mice were collected as described above. Wild type  
458 oocytes were injected with a CON-MO, while the Dazl<sup>+/-</sup> oocytes were injected with a DAZL-MO.  
459 Control experiments show that Dazl<sup>+/-</sup> oocytes have maturation timing and PB extrusion rates  
460 identical to wild type oocytes but a 50% decrease in Dazl mRNA and protein. In addition, pilot



461 experiments showed a dosage effect in DAZL depletion and MII stage block when comparing  
462 DAZL MO injected in wild type oocytes versus DAZL-MO injected in *Dazl*<sup>+/-</sup> oocyte.

463 Oocytes injected with Con-MO and DAZL-MO were preincubated overnight in the presence of 2  
464 uM milrinone and the following morning transferred to maturation medium and incubated for 6  
465 hrs. At the end of the incubation, only oocytes that had undergone GVBD were collected in 5  $\mu$ l  
466 0.1% polyvinylpyrrolidone (PVP) in PBS, flash frozen in liquid nitrogen, and stored at -80°C. In  
467 parallel, GV oocytes were kept in milrinone, then harvested and processed together with the MI  
468 oocytes. A total of 2000 oocytes (0 hr and 6 hrs with either CON-MO or DAZL-MO injection) were  
469 injected and cultured for the duplicate determination of the effect of DAZL depletion on ribosome  
470 loading of endogenous mRNAs. On the day when the RiboTag IP was performed, oocytes were  
471 thawed, lysed and an aliquot of the oocyte extract was saved and stored to measure total  
472 transcript levels before the IP. RiboTag IP was performed as described in the section on  
473 Immunoprecipitation. After IP, all samples were used for RNA extraction using the RNeasy Plus  
474 Micro kit (Qiagen, 74034). The quality of the extracted RNA was monitored with Bioanalyzer chips  
475 (Agilent). RNA samples were transferred to the Gladstone Institutes Genomics Core for cDNA  
476 library preparation using the Ovation RNA-Seq System V2 (NuGen). Samples were sequenced  
477 using the HiSeq400 platform.

#### 478 ***Real-time qPCR***

479 Real-time qPCR was performed using Power SYBR PCR master mix with ABI 7900 Real-Time  
480 PCR system (Applied Biosystems). All oligonucleotide primers used in this project were designed  
481 against two exons flanking an intron to avoid amplification of genomic DNA (Supplementary Table  
482 1). The specificity of each pair of primers was verified by using a unique dissociation curve,  
483 performed at the end of the amplification. Data was normalized to its corresponding input and IgG  
484 in RiboTag/qPCR for HA and DAZL antibody and expressed as the fold-enrichment of  $2^{-\Delta\Delta Ct}$ .

#### 485 ***Western Blotting***

486 Oocytes were lysed in 10 $\mu$ l 2x Lamlli buffer (Bio-Rad) supplemented with mercaptoethanol, and  
487 a cocktail of phosphatase and protease inhibitors (Roche). The oocyte lysates were boiled for 5  
488 mins at 95 °C and then transferred to an ice slurry, then separated on 10% polyacrylamide gels  
489 and transferred to a polyvinylidene difluoride (PVDF) membrane. Membranes were blocked in 5%  
490 milk for 1 hr at room temperature and incubated with primary DAZL antibody (ab215718, Abcam,  
491 1:1000) overnight at 4 °C. An antibody against  $\alpha$ -tubulin (T6074, Sigma-Aldrich; 1:1000) was used

492 as a loading control. After overnight incubation, membrane was washed in TBS-Tween 20  
493 (0.05%) three times and incubated with HRP-conjugated secondary antibodies (Pierce; 1:5000)  
494 for 1 h at room temperature. The signals were detected using Super Signal West Fremto (Thermo  
495 Scientific, 34095).

#### 496 ***Culture of ES Cells***

497 ES cells were handled under sterile conditions and recovered in DMEM medium (high glucose,  
498 Glutamax, Pyruvate) at room temperature. After centrifuging the cells at 200x g and  
499 resuspending with 1.5 ml DMEM culture medium supplemented with 15% KOSR, 2% FBS,  
500 1% 2-Mercaptoethanol, 1% penicillin/streptomycin, 1% MEM Non-Essential Amino Acids, 1000  
501 U/ml LIF, 3  $\mu$ M CHIR-99021, and 1  $\mu$ M PD0325901, ES cells were cultured in multi-well plates  
502 coated with 0.1% gelatin in H<sub>2</sub>O and FBS at 5% CO<sub>2</sub> and 37°C. Culture media was changed daily.  
503 When ES cells reached approximately 80% confluency, they were washed once with DPBS and  
504 incubating with 0.05% Trypsin for 1 min. The reaction was stopped by adding ES cell culture  
505 medium without LIF and 2i and KOSR, KOSR has been replaced with 10% FBS in this medium  
506 (later called MEF Media). Cells were then pelleted by centrifuging at 200 x g for 5 min. The ES  
507 cell pellet was dissolved in RNase-free PBS and stored at -80°C for DAZL IP.

#### 508 ***Immunoprecipitation***

509 RiboTag IP or DAZL RIP analysis was performed as described previously<sup>18, 19</sup>. Briefly, GV-  
510 arrested or MI oocytes (200 oocytes/sample) were washed and collected in RNase-free PBS with  
511 1% polyvinylpyrrolidone. After lysis in 300  $\mu$ l of supplemented homogenization buffer S-HB; 50  
512 mM Tris-HCl pH 7.4, 100 mM KCl, 12 mM MgCl<sub>2</sub>, 1% NP-40, 1 mM dithiothreitol, protease  
513 inhibitors, 40 U RNaseOUT, 100  $\mu$ g/ml cycloheximide and 1 mg/ml heparin (Sigma-Aldrich,  
514 H3393)], samples were centrifuged at 12,000 g for 10 mins and supernatants were precleared  
515 with prewashed Protein G magnetic Dynabeads (Invitrogen, 10007D) for 30 min at 4°C. 15 $\mu$ l of  
516 precleared lysates was aliquot for input (total transcripts) and stored at -80°C for mRNA extraction  
517 in next day. The remain precleared lysates were incubated with specific antibody (anti-HA  
518 antibody, anti-DAZL antibody) or its corresponding IgG (mouse IgG, ab37355; rabbit IgG,  
519 ab37415; Abcam) 4 hrs at 4°C on a rotor. Then pre-washed Protein G magnetic Dynabeads were  
520 added in the lysates for overnight incubation at 4°C on a rotator. The following day, bead pellets  
521 were washed three times in 500  $\mu$ l homogenization buffer (HB) on a rotor at 4°C for 10 min. Two  
522 more washes were performed with 1M urea/high-salt buffer for 10 min each. RNA eluted from  
523 beads was either HA-tagged ribosome associated transcripts or IgG (no-specific binding)

524 transcripts), together with input for extraction. In some experiments, the specificity of the  
525 immunoprecipitation was determined by using WT rather than RiboTag mice. RNA was purified  
526 with RNeasy Plus Micro kit (Qiagen, 74034) according to manufacturer's instructions and directly  
527 used for RNA-Seq analysis or reverse transcription for qPCR analysis. cDNA was prepared using  
528 SuperScript III First-Strand Synthesis system (Invitrogen, 18080-051) with random hexamer  
529 oligonucleotide primers. cDNA samples were stored -80°C for following experiments.

530 For the RiboTag/qPCR analysis, *Ccnb1*, *Dppa3* and *Gdf9* (transcripts not regulated by DAZL as  
531 previous reported<sup>18, 19</sup>), were used to normalize the qPCR data. Zp3 contains no recognizable  
532 DAZL-binding element and was used as negative controls for DAZL immunoprecipitation. The  
533 data are reported as fold enrichment, with IgG values set to 1.

### 534 ***Reporter mRNA preparation and reporter assay***

535 The *Oosp1*, *Obox5*, *CenpE* and *Ccnb1* 3'UTR sequences were obtained by sequencing oocyte  
536 cDNA and cloned downstream of the YPet coding sequence. An oligo (A) stretch of 20A was  
537 added in each construct. All constructs were prepared in the pcDNA 3.1 vector containing a T7  
538 promoter, allowing for in vitro transcription to synthesize mRNAs, and fidelity was confirmed by  
539 DNA sequencing. mRNA reporters were transcribed *in vitro* to synthesize mRNAs with  
540 mMESAGE mMACHINE T7 Transcription Kit (Ambion, AM1344); polyadenylation of *mCherry*  
541 was obtained using Poly(A) Tailing Kit (Ambion, AM1350). All the messages were purified using  
542 MEGAclean Kit (Ambion, AM1908). mRNA concentrations were measured by NanoDrop and its  
543 integrity was evaluated by electrophoresis.

544 Time-lapse recordings were performed using a Nikon Eclipse T2000-E equipped with mobile  
545 stage and environmental chamber of 37°C and 5% CO<sub>2</sub>. *YFP-Oosp1*, *YFP-Obox5*, *YFP-Cenpe*  
546 or *YFP-CcnB1* were injected at 12.5 ng/μL with either CON-MO or DAZL-MO. Each *YFP-3'UTR*  
547 reporters we also co-injected with polyadenylated *mCherry* at 12.5 μg/μL in oocyte. After injection,  
548 oocytes were pre-incubated overnight in α-MEM medium supplemented with 2 μM cilostamide to  
549 allow expression of the reporters. mCherry signals did not change significantly in oocytes at  
550 different stages of maturation. Ratios of YFP reporter and the level of mCherry signal measured  
551 at plateau in each oocyte were calculated. In those cases where DAZL ablation had an effect in  
552 GV oocytes, the data were normalized to the signal of GV stage accumulation of corresponding  
553 proteins. Rate of translation associate with reentering into cell cycle (after GVBD versus before  
554 GVBD) were calculated by fitting YFP:mCherry data and calculating the slope of the interpolation

555 obtained by linear regression (Prism) prior to GVBD or after GVBD when a new rate of translation  
556 had stabilized.

### 557 ***DAZL RIP-Chip analysis***

558 DAZL RIP-Chip was performed as previously reported<sup>18</sup>. Briefly, C57BL/6 female mice (22–24  
559 days old) were primed with PMSG, after 48 hrs, mice were stimulated with hCG for 0 hr, 6 hrs, or  
560 14 hrs to collect GV, MI, and MII stage oocytes. Oocyte lysates were centrifuged at 12,000 g for  
561 10 mins at 4°C. Supernatants were used for RNA extraction. RNA was purified with RNeasy Plus  
562 Micro kit (Qiagen). RNAs in the RNP fractions were reverse-transcribed with SuperScript III  
563 (Invitrogen). Five micrograms of cDNA was fragmented and hybridized with Affymetrix Mouse  
564 Genome 430.2 array chips<sup>46</sup>. DNA-Chip Analyzer (dChip) was used for normalization and to  
565 quantify microarray signals with default analysis parameters. Comparison between samples was  
566 performed using dChip with a fold change of 1.5, FDR < 5%, and P < 0.05.

### 567 ***Statistical analysis***

568 Statistical analysis was performed using the GraphPad Prism8 package. The statistical analysis  
569 performed depended on specific experiment and is reported in the figure legend. For comparison  
570 between two groups, two-tailed paired t-test was used. Statistical significances is denoted by  
571 asterisk in each graph. The quality check of RNA-Seq reads was performed using FastQC and  
572 reads were then trimmed with Trimmomatic. Alignment of the reads to the mouse genome was  
573 performed by Hisat2, .bam files were sorted and indexed using Samtools, and count files were  
574 generated by HTSeq. TMM normalization and the remaining RNA-Seq statistical analyses were  
575 done through edgeR and other Bioconductor scripts.

### 576 ***Acknowledgements***

577 We wish to thank Dr. Matthew Cook for the help in the RIP-Chip experiments. We thank Dr.  
578 Soeren Muller and Dr. Xiaoyuan Zhou for their help and advice on processing and analyzing  
579 the RNA-Seq data. This work was supported by NIH R01 GM097165, GM116926 and the  
580 Specialized Cooperative Centres Programme in Reproduction and Infertility Research  
581 (P50HD055764-10), Eunice Kennedy Shriver National Institute of Child Health and Human  
582 Development (NICHD) to MC. Enrico Maria Daldello is supported by a Fellowship from the  
583 Lalor Foundation. Xuan G. Luong is supported by a T32-HD007263 Integrated Training in  
584 Reproductive Sciences.

585 **References**

- 586 1. Seydoux G, Braun RE. Pathway to totipotency: lessons from germ cells. *Cell* **127**, 891-  
587 904 (2006).  
588  
589 2. Schultz RM. From egg to embryo: a peripatetic journey *Reproduction* **130**, 825-828  
590 (2005).  
591  
592 3. Vardy L, Orr-Weaver TL. Regulating translation of maternal messages: multiple  
593 repression mechanisms. *Trends Cell Biol* **17**, 547-554 (2007).  
594  
595 4. Sugimori S, Kumata Y, Kobayashi S. Maternal Nanos-Dependent RNA Stabilization in  
596 the Primordial Germ Cells of Drosophila Embryos. *Dev Growth Differ* **60**, 63-75 (2018).  
597  
598 5. Clarke HJ. Post-transcriptional control of gene expression during mouse oogenesis.  
599 *Results Probl Cell Differ* **55**, 1-21 (2012).  
600  
601 6. Kuersten S, Goodwin EB. The power of the 3' UTR: translational control and  
602 development. *Nat Rev Genet* **4**, 626-637 (2003).  
603  
604 7. Weill L, Belloc E, Bava FA, Mendez R. Translational control by changes in poly(A) tail  
605 length: recycling mRNAs. *Nat Struct Mol Biol* **19**, 577-585 (2012).  
606  
607 8. Radford HE, Meijer HA, de Moor CH. Translational control by cytoplasmic  
608 polyadenylation in Xenopus oocytes. *Biochim Biophys Acta* **1779**, 217-229 (2008).  
609  
610 9. Richter JD. CPEB: a life in translation. *Trends Biochem Sci* **32**, 279-285 (2007).  
611  
612 10. Reynolds N, Cooke HJ. Role of the DAZ genes in male fertility. *Reprod Biomed Online*  
613 **10**, 72-80 (2005).  
614  
615 11. Brook M, Smith JW, Gray NK. The DAZL and PABP families: RNA-binding proteins with  
616 interrelated roles in translational control in oocytes. *Reproduction* **137**, 595-617 (2009).  
617  
618 12. Lin Y, Page DC. Dazl deficiency leads to embryonic arrest of germ cell development in  
619 XY C57BL/6 mice. *Developmental biology* **288**, 309-316 (2005).  
620  
621 13. Reynolds N, *et al.* Dazl binds in vivo to specific transcripts and can regulate the pre-  
622 meiotic translation of Mvh in germ cells. *Hum Mol Genet* **14**, 3899-3909 (2005).  
623  
624 14. Collier B, Gorgoni B, Loveridge C, Cooke HJ, Gray NK. The DAZL family proteins are  
625 PABP-binding proteins that regulate translation in germ cells. *The EMBO journal* **24**,  
626 2656-2666 (2005).  
627  
628 15. Chen HH, *et al.* DAZL limits pluripotency, differentiation, and apoptosis in developing  
629 primordial germ cells. *Stem Cell Reports* **3**, 892-904 (2014).  
630  
631 16. Kobayashi M, Tani-Matsuhana S, Ohkawa Y, Sakamoto H, Inoue K. DND protein  
632 functions as a translation repressor during zebrafish embryogenesis. *Biochem Biophys*  
633 *Res Commun* **484**, 235-240 (2017).  
634

- 635 17. Zagore LL, *et al.* DAZL Regulates Germ Cell Survival through a Network of PolyA-  
636 Proximal mRNA Interactions. *Cell Rep* **25**, 1225-1240 e1226 (2018).  
637
- 638 18. Chen J, *et al.* Genome-wide analysis of translation reveals a critical role for deleted in  
639 azoospermia-like (Dazl) at the oocyte-to-zygote transition. *Genes & development* **25**,  
640 755-766 (2011).  
641
- 642 19. Sousa Martins JP, *et al.* DAZL and CPEB1 regulate mRNA translation synergistically  
643 during oocyte maturation. *J Cell Sci* **129**, 1271-1282 (2016).  
644
- 645 20. Fukuda K, Masuda A, Naka T, Suzuki A, Kato Y, Saga Y. Requirement of the 3'-UTR-  
646 dependent suppression of DAZL in oocytes for pre-implantation mouse development.  
647 *PLoS Genet* **14**, e1007436 (2018).  
648
- 649 21. McNeilly JR, Watson EA, White YA, Murray AA, Spears N, McNeilly AS. Decreased  
650 oocyte DAZL expression in mice results in increased litter size by modulating follicle-  
651 stimulating hormone-induced follicular growth. *Biology of reproduction* **85**, 584-593  
652 (2011).  
653
- 654 22. Welling M, *et al.* DAZL regulates Tet1 translation in murine embryonic stem cells. *EMBO*  
655 *Rep* **16**, 791-802 (2015).  
656
- 657 23. Percharde M, Bulut-Karslioglu A, Ramalho-Santos M. Hypertranscription in  
658 Development, Stem Cells, and Regeneration. *Dev Cell* **40**, 9-21 (2017).  
659
- 660 24. Yan C, Pendola FL, Jacob R, Lau AL, Eppig JJ, Matzuk MM. Oosp1 encodes a novel  
661 mouse oocyte-secreted protein. *Genesis* **31**, 105-110 (2001).  
662
- 663 25. Rajkovic A, Yan C, Yan W, Klysik M, Matzuk MM. Obox, a family of homeobox genes  
664 preferentially expressed in germ cells. *Genomics* **79**, 711-717 (2002).  
665
- 666 26. Jenkins HT, Malkova B, Edwards TA. Kinked beta-strands mediate high-affinity  
667 recognition of mRNA targets by the germ-cell regulator DAZL. *Proc Natl Acad Sci U S A*  
668 **108**, 18266-18271 (2011).  
669
- 670 27. Zeng M, *et al.* DAZL binds to 3'UTR of Tex19.1 mRNAs and regulates Tex19.1  
671 expression. *Mol Biol Rep* **36**, 2399-2403 (2009).  
672
- 673 28. Ollinger R, *et al.* Deletion of the pluripotency-associated Tex19.1 gene causes activation  
674 of endogenous retroviruses and defective spermatogenesis in mice. *PLoS Genet* **4**,  
675 e1000199 (2008).  
676
- 677 29. MacLennan M, *et al.* Mobilization of LINE-1 retrotransposons is restricted by Tex19.1 in  
678 mouse embryonic stem cells. *Elife* **6**, (2017).  
679
- 680 30. Tarabay Y, *et al.* The mammalian-specific Tex19.1 gene plays an essential role in  
681 spermatogenesis and placenta-supported development. *Hum Reprod* **28**, 2201-2214  
682 (2013).  
683
- 684 31. Yu C, *et al.* BTG4 is a meiotic cell cycle-coupled maternal-zygotic-transition licensing  
685 factor in oocytes. *Nat Struct Mol Biol* **23**, 387-394 (2016).



- 686  
687 32. Pasternak M, Pfender S, Santhanam B, Schuh M. The BTG4 and CAF1 complex  
688 prevents the spontaneous activation of eggs by deadenylating maternal mRNAs. *Open*  
689 *biology* **6**, (2016).  
690  
691 33. Liu Y, *et al.* BTG4 is a key regulator for maternal mRNA clearance during mouse early  
692 embryogenesis. *J Mol Cell Biol* **8**, 366-368 (2016).  
693  
694 34. Wu D, Dean J. BTG4, a maternal mRNA cleaner. *J Mol Cell Biol* **8**, 369-370 (2016).  
695  
696 35. Rosario R, Smith RW, Adams IR, Anderson RA. RNA immunoprecipitation identifies  
697 novel targets of DAZL in human foetal ovary. *Mol Hum Reprod* **23**, 177-186 (2017).  
698  
699 36. Wiszniak SE, Dredge BK, Jensen KB. HuB (elavl2) mRNA is restricted to the germ cells  
700 by post-transcriptional mechanisms including stabilisation of the message by DAZL.  
701 *PLoS One* **6**, e20773 (2011).  
702  
703 37. Cheng MH, Maines JZ, Wasserman SA. Biphasic subcellular localization of the DAZL-  
704 related protein boule in Drosophila spermatogenesis. *Dev Biol* **204**, 567-576 (1998).  
705  
706 38. Sha QQ, *et al.* A MAPK cascade couples maternal mRNA translation and degradation to  
707 meiotic cell cycle progression in mouse oocytes. *Development* **144**, 452-463 (2017).  
708  
709 39. Robu ME, *et al.* p53 activation by knockdown technologies. *PLoS Genet* **3**, e78 (2007).  
710  
711 40. Danilova N, Kumagai A, Lin J. p53 upregulation is a frequent response to deficiency of  
712 cell-essential genes. *PLoS One* **5**, e15938 (2010).  
713  
714 41. Moulton JD. Making a Morpholino Experiment Work: Controls, Favoring Specificity,  
715 Improving Efficacy, Storage, and Dose. *Methods Mol Biol* **1565**, 17-29 (2017).  
716  
717 42. Rossi A, *et al.* Genetic compensation induced by deleterious mutations but not gene  
718 knockdowns. *Nature* **524**, 230-233 (2015).  
719  
720 43. Padmanabhan K, Richter JD. Regulated Pumilio-2 binding controls RINGO/Spy mRNA  
721 translation and CPEB activation. *Genes Dev* **20**, 199-209 (2006).  
722  
723 44. Mendez R, Hake LE, Andresson T, Littlepage LE, Ruderman JV, Richter JD.  
724 Phosphorylation of CPE binding factor by Eg2 regulates translation of c-mos mRNA.  
725 *Nature* **404**, 302-307 (2000).  
726  
727 45. Tung JY, *et al.* Novel missense mutations of the Deleted-in-AZoospermia-Like (DAZL)  
728 gene in infertile women and men. *Reprod Biol Endocrinol* **4**, 40 (2006).  
729  
730 46. Su YQ, *et al.* Selective degradation of transcripts during meiotic maturation of mouse  
731 oocytes. *Dev Biol* **302**, 104-117 (2007).  
732

733

734



## 735 **Figure Legends**

### 736 **Figure 1. Interference with *Dazl* mRNA translation depletes the oocyte of the DAZL protein** 737 **and inhibits translation of a specific downstream target**

738 **(a)** DAZL protein accumulation during the transition from the GV-to-MI stage of oocyte maturation.  
739 Accumulation of  $\alpha$ -tubulin was used as a loading control. GV stage oocytes from wild type mice  
740 were cultured *in vitro* for maturation. After 0-8 hrs maturation, oocytes were collected, lysed in  
741 sample buffer, and used for Western blot analysis. 150 oocytes per lane was loaded in this  
742 experiment. **(b)** Morpholino down-regulation of DAZL protein. GV stage oocytes from wild type or  
743 DAZL Heterozygous mice were injected with CON or DAZL MO. Oocytes were preincubated  
744 overnight with 2  $\mu$ M milrinone and then cultured in inhibitor-free medium for maturation. After 6hrs,  
745 oocytes were collected and used for Western blot analysis. A representative experiment of the  
746 three performed is reported. **(c-e)** Ribosome loading of endogenous *Dazl* and *Tex19.1*, but not  
747 *CcnB1*, mRNA is blocked after DAZL depletion. GV stage oocytes from wild type or *Dazl*<sup>+/-</sup> mice  
748 were injected with CON-MO or *Dazl* MO and preincubated overnight in 2  $\mu$ M milrinone, then  
749 cultured in inhibitor-free medium for maturation. Oocytes were collected at 0 hr and 6 hrs for  
750 RiboTag IP followed by qPCR analysis. (GV:germinal vesicle; MI:Meiosis I). Each dot represents  
751 the average of triplicate measurements from independent biological samples collected in different  
752 days. \*\* P<0.01; \*\*\*\* P<0.0001.

### 753 **Figure 2. Maternal mRNA loading onto ribosome is disrupted in oocytes depleted of DAZL**

754 **(a)** Comparison of the transcriptomes of oocytes injected with control and *Dazl* MO. Oocytes from  
755 wild type mice were injected with a CON-MO whereas oocytes from heterozygous *Dazl* mice were  
756 injected with a DAZL-MO. Oocytes were incubated overnight in the presence of milrinone and the  
757 following morning were collected for RiboTag IP/RNASeq as described in the 'Materials and  
758 Methods'. The average input (total transcripts) CPM data from duplicate biological replicates is  
759 reported. **(b)** Comparison of transcripts recovered by RiboTag IP/RNASeq in Control and *Dazl*  
760 MO injected oocytes (MI). GV stage oocytes from wild type or *Dazl*<sup>+/-</sup> mice were injected with  
761 CON-MO or *Dazl*-MO. After overnight preincubation with 2  $\mu$ M milrinone, oocytes were cultured  
762 in inhibitor-free medium to allow reentry into the meiotic cell cycle. Oocytes were collected at 6hrs  
763 for RiboTag IP and RNA-Seq analysis as detailed in the methods. Ribosome loading of the  
764 majority of transcripts present in the oocyte is not significantly changed after DAZL removal (grey  
765 dots). Ribosome loading of a subgroup (551 transcripts) of mRNAs (blue, FDR < 0.05) is

766 significantly decreased, while ribosome loading of a distinct subgroup (170) of transcripts is  
767 significantly increased after DAZL removal (red dots, FDR < 0.05). **(c-e)** effect of DAZL depletion  
768 on RNA levels and ribosome loading of representative DAZL interacting targets. **(c)** DAZL RIP-  
769 Chip of oocyte extracts immunoprecipitation of selected mRNAs is reported as the fold  
770 enrichment DAZL AB/IgG N=3. **(d and e)** GV stage oocytes from wild type or *Dazl*<sup>+/-</sup> mice were  
771 injected with control or *Dazl* MOs. After overnight preincubation with 2  $\mu$ M milrinone, oocytes were  
772 cultured in inhibitor-free medium for maturation. Oocytes were collected at 0hr (GV) and 6hrs (MI)  
773 for RiboTag IP and RNA-Seq analysis. **(d)** RNASeq data from supernatants (input) from RiboTag  
774 IP of control and *Dazl* MO **(e)** RiboTag IP/RNASeq analysis documented an increase in ribosome  
775 loading onto these transcripts (*Tex19.1* and *Txnip*) in control oocytes but the increase is absent  
776 after DAZL KD. *Akap10* and *Nsf* mRNA translation is increased after DAZL depletion.

777 **Figure 3. RiboTag IP/qPCR confirms the presences of a subset of transcripts whose**  
778 **translation is upregulated and downregulated in oocytes depleted of DAZL.**

779 Representative targets affected by DAZL removal in RiboTag/RNA-Seq dataset are showed in  
780 panel **(a)** (transcripts whose translation is downregulated by DAZL removal) and **c** (transcripts  
781 whose translation is upregulated by DAZL removal); the differences in ribosome loading DAZL  
782 MO/CON-MO for the same transcripts assessed in independent biological replicates by RiboTag  
783 IP/qPCR is reported in panel **(b)** and **(d)**. *Dppa3* and *Ccnb1* are used as negative control in panel  
784 **(a)** and **(b)** for the transcripts whose translation is downregulated by DAZL removal, as they are  
785 not regulated by DAZL during oocyte maturation. *Gdf9* mRNA is used as negative control in panel  
786 **(c)** and **(d)** for the transcripts whose translation is upregulated by DAZL removal, as it is not  
787 regulated by DAZL during oocyte maturation. Wild type and *Dazl*<sup>+/-</sup> mice were injected with control  
788 or DAZL-MO. After overnight preincubation with 2  $\mu$ M milrinone, oocytes were cultured in inhibitor-  
789 free medium for maturation. Oocytes were collected at 6 hrs for RiboTag IP and qPCR analysis.

790 **Figure 4. DAZL interacts with transcripts whose translation is upregulated or**  
791 **downregulated during oocyte maturation**

792 **a.** Comparison DAZL TipChip/RiboTag IP RNseq in oocytes. Changes in ribosome loading from  
793 0 hr (GV) to 16 hrs (MII stage) of DAZL targets assessed by RIP-Chip. A subset of transcripts  
794 whose translation increased from GV to MII stage are also enriched in DAZL immunoprecipitates  
795 of oocyte extracts (red); transcripts whose translation decreases during oocyte maturation are  
796 specifically immunoprecipiated by DAZL Antibody (blue). wild type oocytes were collected at 0h  
797 and 6hrs of *in vitro* maturation for RiboTag IP/RNASeq analysis. For DAZL RIP-Chip, wild type

798 oocytes were primed with PMSG and after stimulation with hCG, MII stage oocytes were  
799 harvested as described. Oocyte lysates was immunoprecipitated with DAZL-specific antibody or  
800 IgG and the mRNA recovered in the IP pellet measured by microarray hybridization. (RIP-Chip  
801 data kindly provided by Jing Chen and Mat Cook members of the lab) **(b)** DAZL RNA-IP qPCR  
802 of ES cells extracts. ES cells were cultured in DMEM medium with supplements include 15%  
803 KOSR, 2% FBS, 1x MEM Non-Essential Amino Acids (100x), 1x 2-mercaptoethanol,  $10^{-7}$  U/ml  
804 LIF, 1x Pen/Strep and 2i (1  $\mu$ M PD0325901 and 3 $\mu$ M CHIR99021) and collected for DAZL RNA-  
805 IP/qPCR analysis. The results are normalized with IgG IP. Asterisks (\*) indicate that these  
806 transcripts are also found to be associated with DAZL also in the RIP-Chip dataset.

807 **Figure 5. The 3' UTR of *Oosp1* and *Obox5* recapitulates the effect of DAZL depletion on**  
808 **mRNA translation**

809 Oocytes were injected with 12.5ng/uL *mCherry*-polyadenylated mRNA and 12.5ng/uL *YFP-*  
810 *Oosp1* 3'UTR reporter for or *YFP-Obox5* 3'UTR reporter with either CON-MO or DAZL-MO.  
811 Oocytes were then pre-incubated overnight to allow the mCherry signal to reach a plateau. At the  
812 end of the preincubation, oocytes were released in cilostamide-free medium for maturation and  
813 YFP and mCherry signal were recorded by time lapse microscopy at a sampling rate of 30 min  
814 for 12 hrs. The YFP signal were corrected by the level of coinjected mCherry signal and  
815 normalized to the first recording of YFP/mCherry. Experiments were repeated three times and  
816 the data are the cumulative mean $\pm$ SEM of three independent experiments. DAZL depletion  
817 decrease translation of reporter driven by the *Oosp1* **(a)** or *Obox5* **(c)** 3'UTR during oocyte  
818 maturation, while *YFP-CcnB1* 3'UTR **(e)** is not affected. Individual oocyte YFP/mCherry were  
819 used to calculate the rate of translation of the reporters at the 0-2 hrs (prior to GVBD) and 5-10  
820 hrs (after GVBD).The rates of *YFP-Oosp1* **(b)** ( $p < 0.0001$ ) or *YFP-Obox5* **(d)** ( $p < 0.0001$ )  
821 translational accumulation are significantly decreased in GVBD after DAZL removal, whereas the  
822 rates of *YFP-CcnB1* **(f)** translation are not significantly changed.

823 **Figure 6. The translation of the *YFP-Oosp1* reporter is rescued by DAZL protein**

824 **(a)** Human DAZL protein injection restores *Oosp1* translation during oocyte maturation in MO  
825 injected oocytes. Oocytes were injected with 12.5ng/uL *mCherry* mRNA and 12.5ng/uL *YFP-*  
826 *Oosp1* 3' UTR reporter with either CON-MO or DAZL-MO with or without recombinant human  
827 DAZL protein, and incubated in cilostamide medium overnight to allow mCherry signal to reach a  
828 plateau. At the end of the preincubation, oocytes were released in cilostamide-free medium for  
829 maturation and YFP and mCherry signal recorded by time lapse microscopy at a sampling rate of

830 30 mins for 12 hrs. YFP signal were corrected by the level of co-injected mCherry signal and were  
831 normalized to the first time point. Experiments were repeated 3 times and the data are the mean  
832  $\pm$  SEM of three independent experiments. **(b)** Human DAZL protein injection restores the rate of  
833 *YFP-Oosp1* translation with the effect of DAZL depletion in GVBD to levels of CON-MO. **(c)**  
834 Microinjection of a human DAZL protein rescues the meiotic block of oocytes injected with DAZL-  
835 MO. Oocytes maturation was scored by counting the number of oocytes with a polar body. The  
836 injection of this human DAZL protein restored polar body formation to levels not significantly  
837 different from control (63% versus 70%). Three independent experiments were performed and  
838 the data reported here are the average ratio of polar body extrusion.

839 **Figure 7. DAZL depletion increases translation of *Oosp1* and *Obox5* endogenous**  
840 **transcripts and *Oosp1* and *Obox5* reporters in GV-arrested oocytes.**

841 **(a, c, e)** GV stage oocytes from wild type or *Dazl*<sup>+/-</sup> mice were injected with CON-MO or DAZL-  
842 MO. Oocytes were preincubated overnight with 2  $\mu$ M milrinone and then cultured in inhibitor-free  
843 medium for maturation. 0hr (GV stage) data from RiboTag IP/ RNA-Seq was used for Tra  
844 nslational efficiency (TE) analysis. TE was calculated as the ratio of the CPM for HA  
845 immunoprecipitated transcripts *Oosp1* or *Obox5* over the corresponding input at 0 hr oocyte. The  
846 TEs for *Oosp1* **(a)** and *Obox5* **(c)** is increased in GV oocytes depleted of DAZL. However, TE for  
847 *CcnB1* **(e)** is not affected. **(b, d, f)** GV stage oocytes were injected with 12.5ng/uL *mCherry*-  
848 polyadenylated mRNA and 12.5ng/uL *YFP-3' UTR* reporter for *Oosp1* 3' UTR or *Obox5* 3'UTR  
849 with either CON-MO or DAZL-MO. Oocytes were pre-incubated overnight to allow mCherry  
850 signal to plateau, then released in cilostamide-free medium. YFP signal were corrected by the  
851 level of coinjected mCherry signal. The translation of both reporters in GV-arrested oocytes is  
852 significantly increased *Oosp1* ( $p < 0.0001$ ) **(b)** and *Obox5* ( $p = 0.0007$ ) **(d)** in DAZL-MO injection  
853 group, whereas no significant difference in the translation of the *CcnB1* reporter **(f)** is detected.  
854 Experiments were repeated three times and the data reported are the rates for each individual  
855 oocytes from three independent biological replicates.

856 **Figure 8. Translation of *Oosp1* and *Obox5* reporter is dependent on the presence of a DAZL**  
857 **binding element.**

858 Constructs with the mutated DAZL-binding sequence, with wild type *Oosp1* 3' UTR, or with the  
859 *Obox5* 3'UTR along with *mCherry*-polyadenylated mRNA were injected into GV stage oocytes at  
860 12.5ng/uL per reporter. After overnight pre-incubation to allow mCherry signal to plateau, oocytes  
861 were released in cilostamide-free medium and recorded under the microscope for tracking *YFP*-

862 *Oosp1* or *YFP-Obox5* translation during oocyte maturation. YFP and mCherry images were  
863 acquired every 30 mins for 18 hrs. YFP signal were corrected by the level of co-injected mCherry  
864 signal. Experiments were repeated three times on different days. **(a)** Scheme of the *Oosp1* and  
865 *Obox5* 3' UTR and position of the PAS, and putative CPEB and DAZL-binding elements.  
866 Mutagenesis of the putative DAZL-binding element was performed as detailed in 'Materials and  
867 Methods' section. A red oval is the DAZL consensus sequence in the 3'UTR of *Oosp1* and *Obox5*.  
868 A black cross indicates the mutated DAZL-binding consensus sequence. **(b and e)** The effect of  
869 DAZL-binding element mutation on *Oosp1* ( $p = 0.0062$ ) or *Obox5* ( $p < 0.0001$ ) translation in GV  
870 stage. Rates of reporter accumulation were calculated in each GV-arrested oocyte and plotted as  
871 individual dots. Mean and SEM values were calculated from all the oocytes measured from three  
872 different experiments. **(c and f)** Mutation of DAZL-binding element on 3'UTR of *Oosp1* or *Obox5*  
873 decreases translation of each respective reporter during oocyte maturation. YFP signals were  
874 corrected by the level of co-injected mCherry signal. Every time point was normalized to the first  
875 time point of YFP:mCherry. **(d and g)** The rates of *YFP-Oosp1* ( $p < 0.0001$ ) or *YFP-Obox5* ( $p <$   
876  $0.0001$ ) reporter accumulation during maturation is significantly decreased in GVBD after  
877 mutation of the putative DAZL site.

878

879

**a**

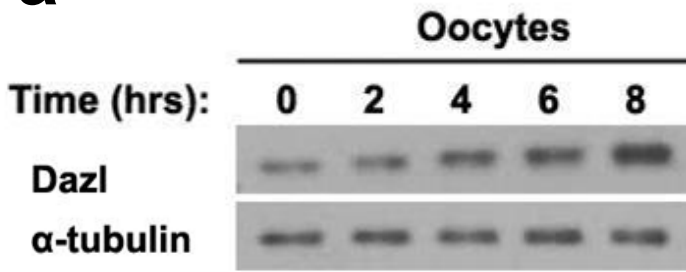

**b**

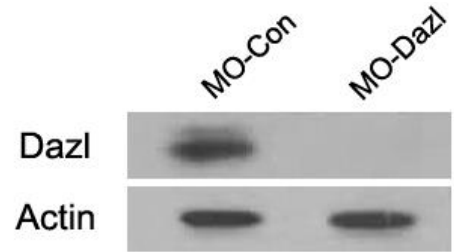

**c**

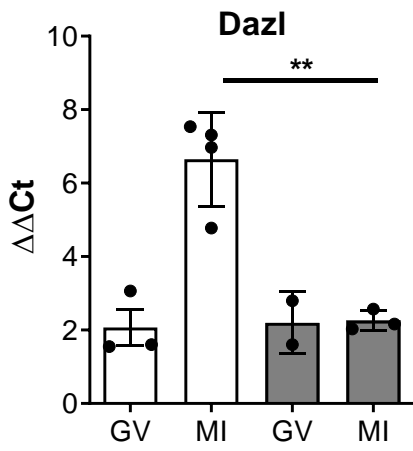

**d**

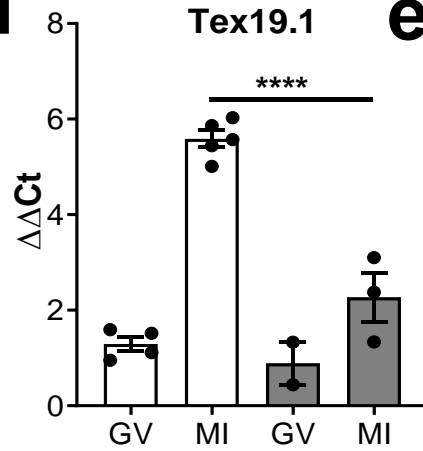

**e**

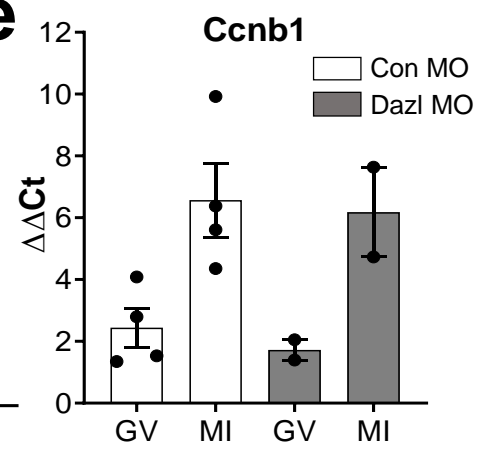

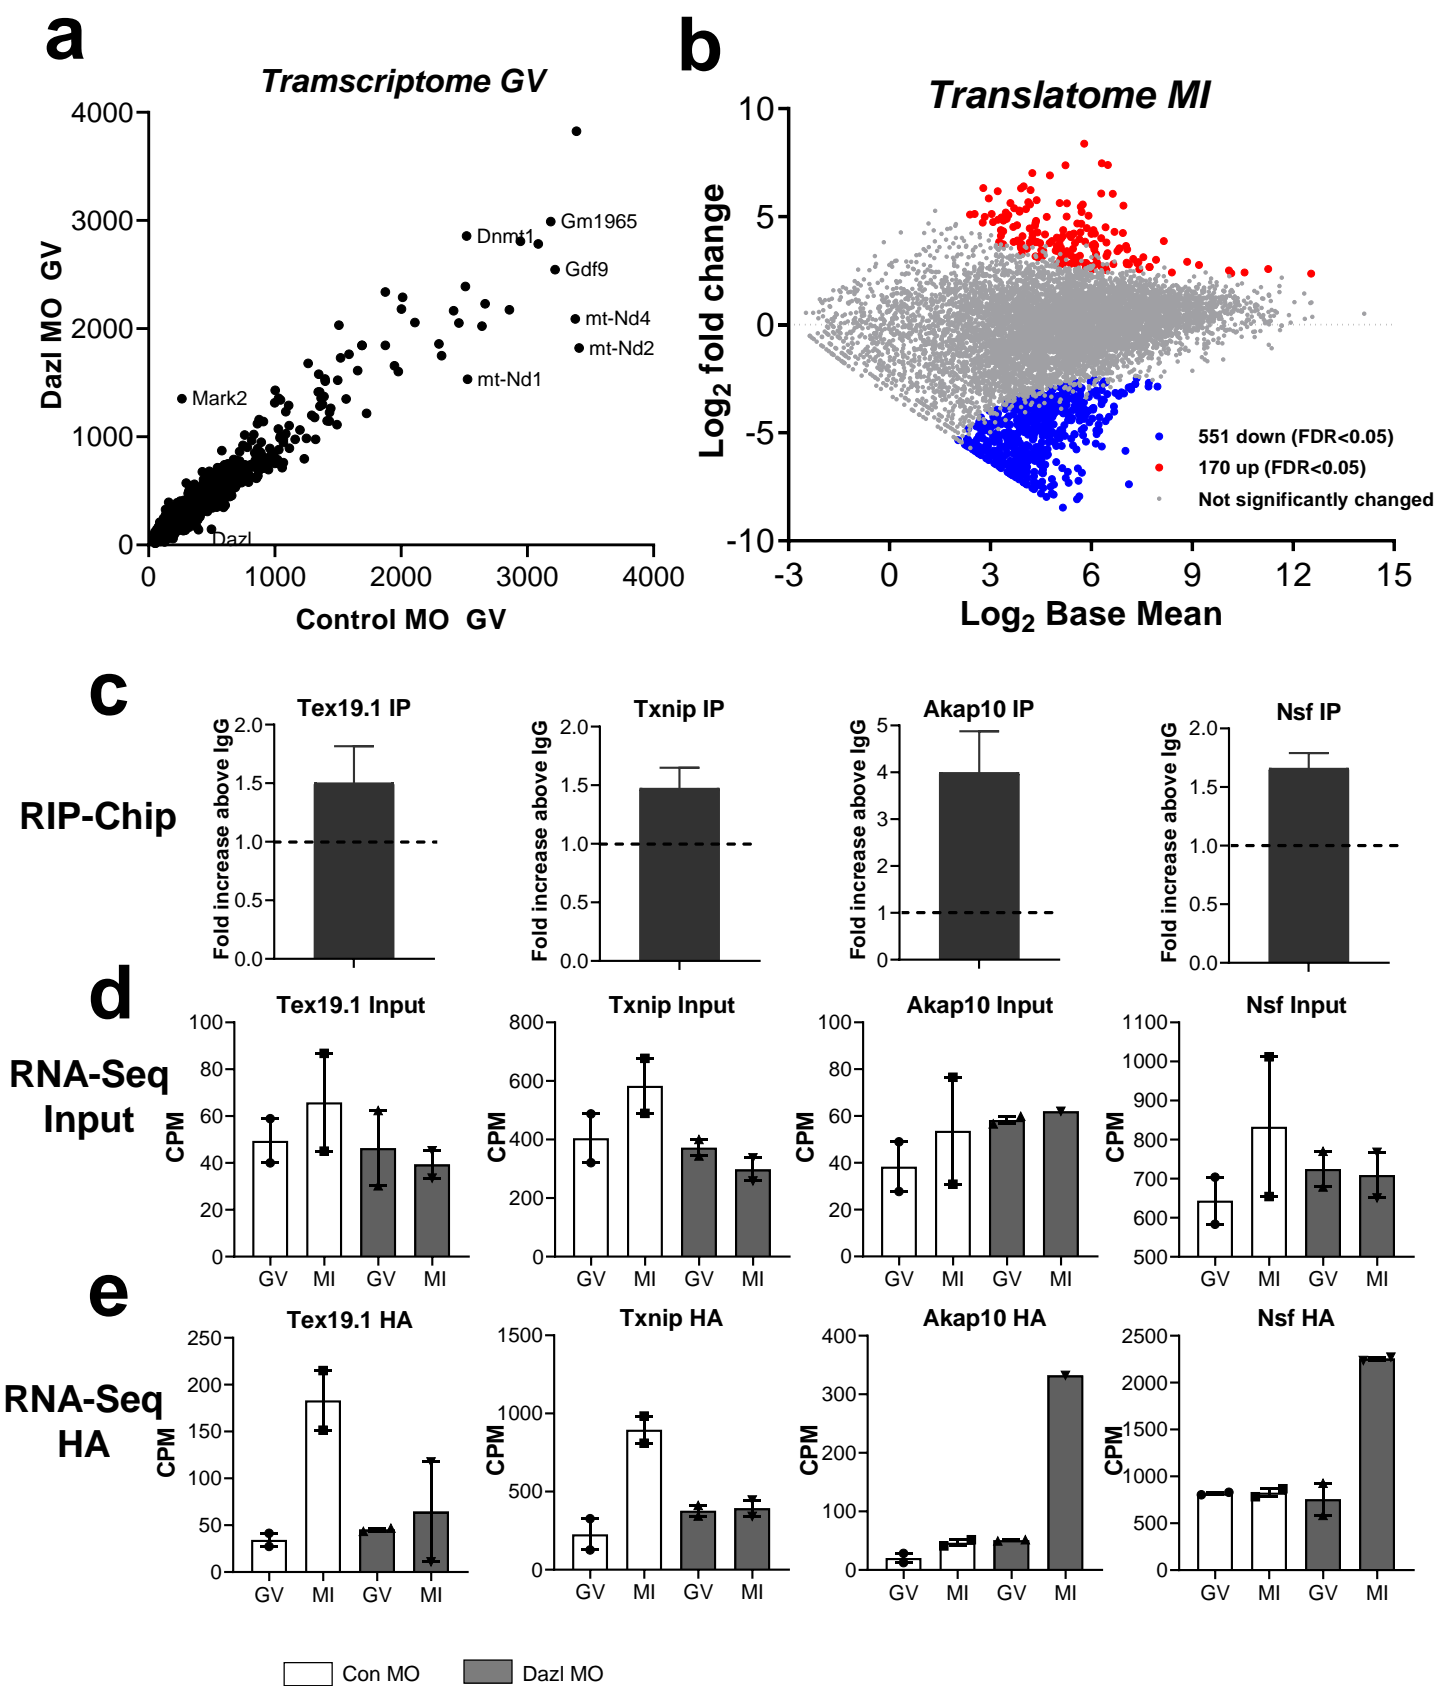



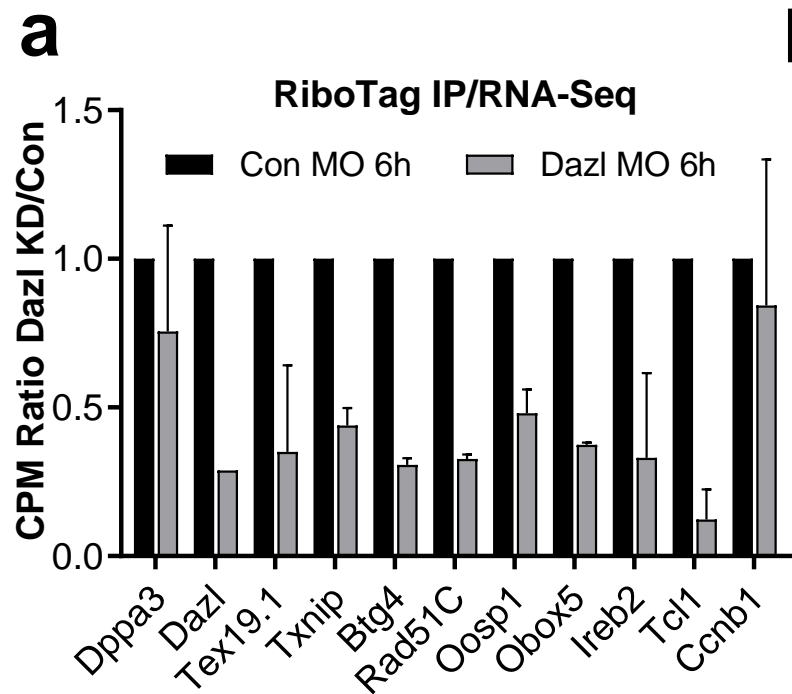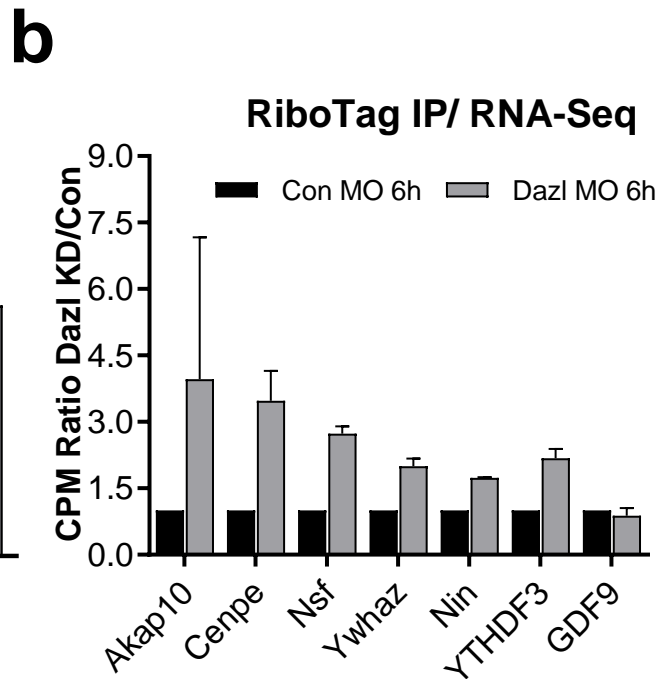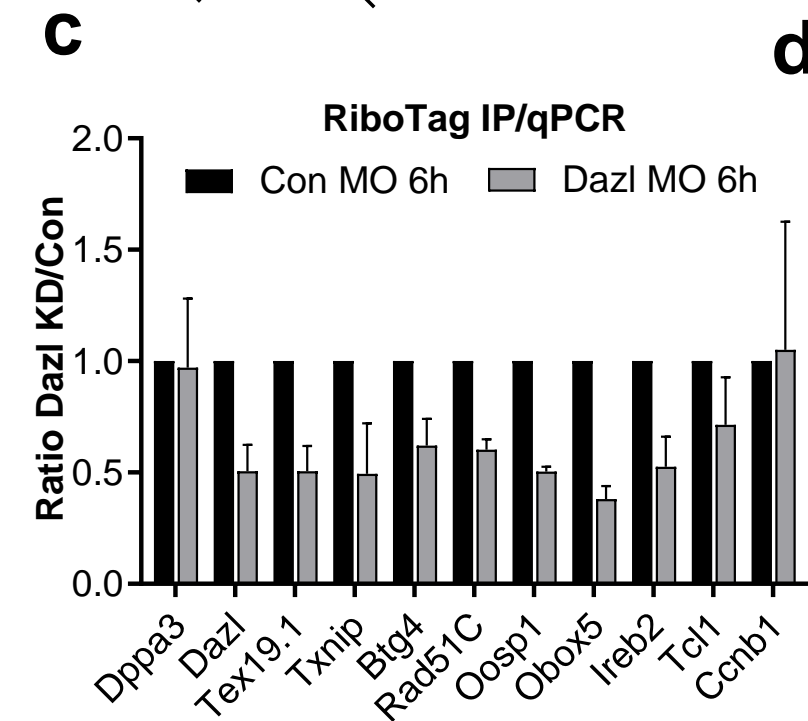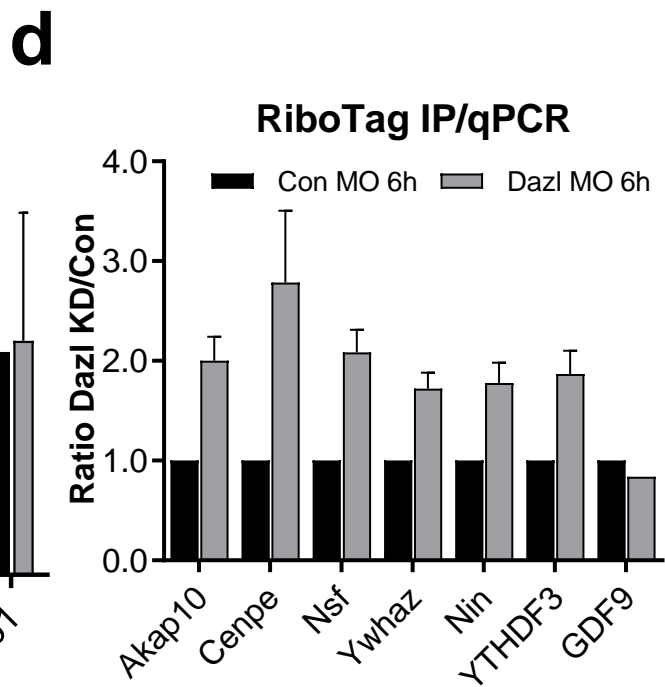

**a**

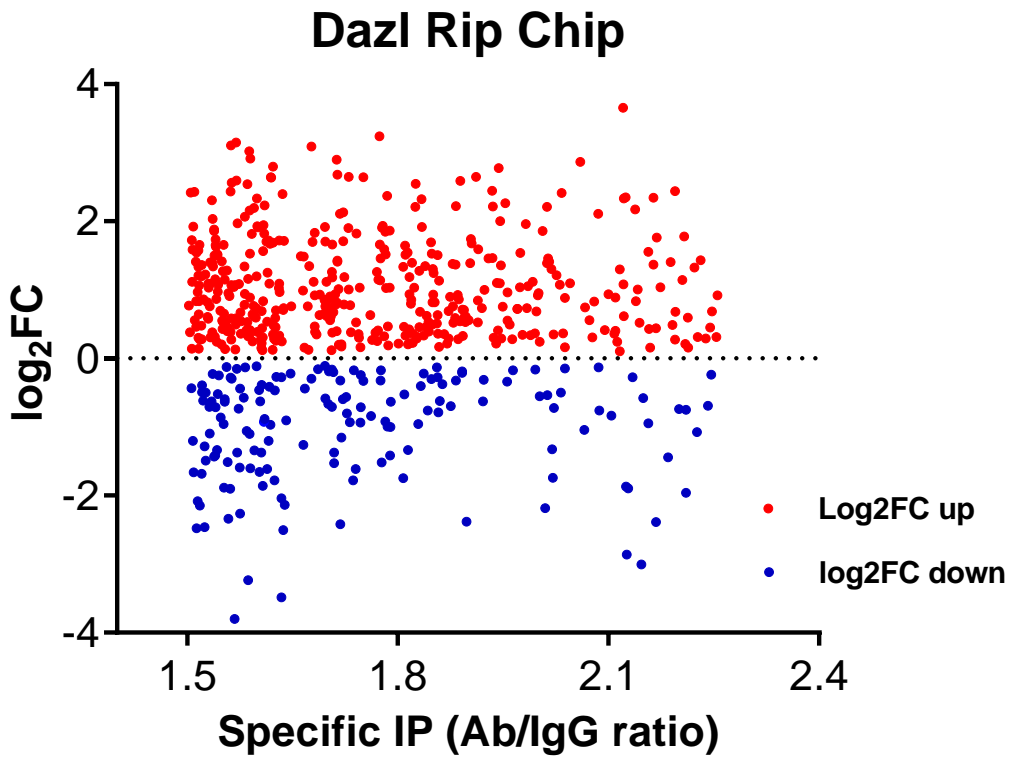

**b**

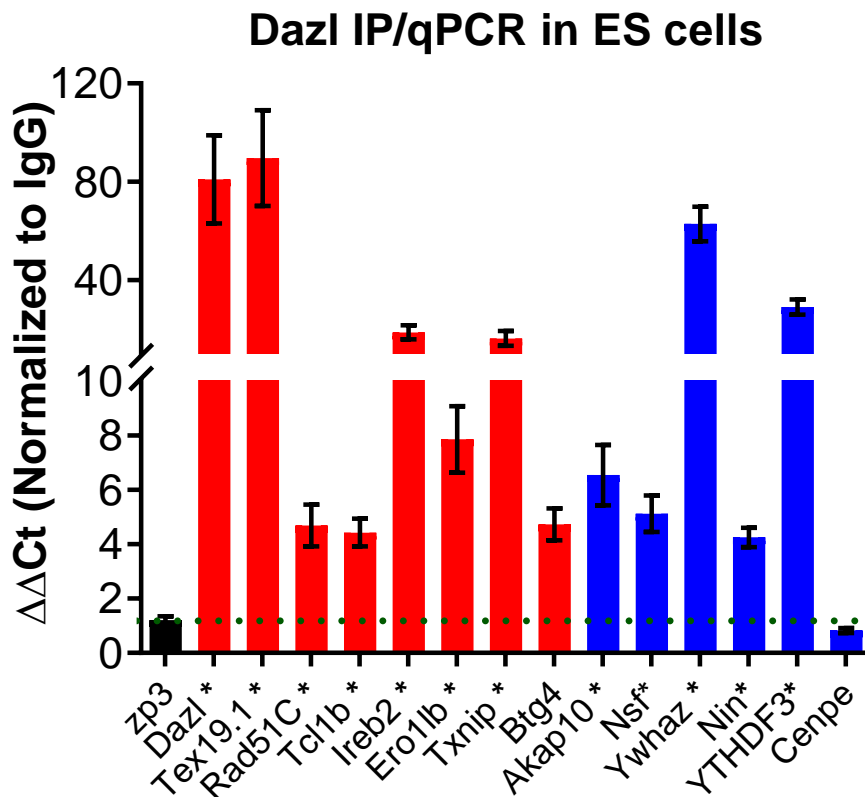

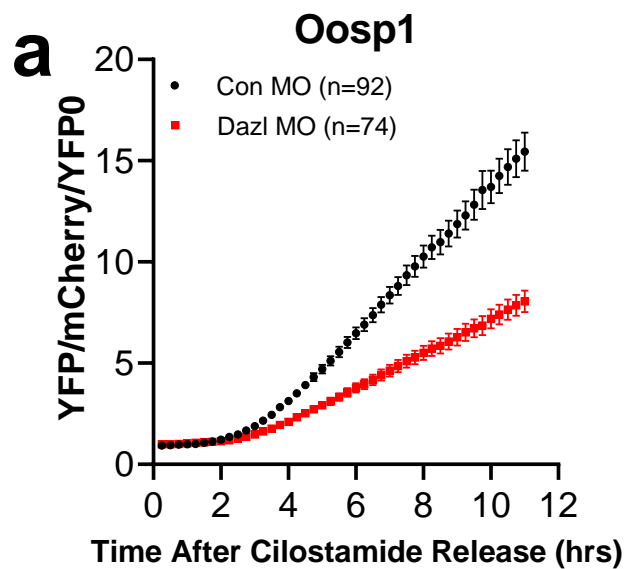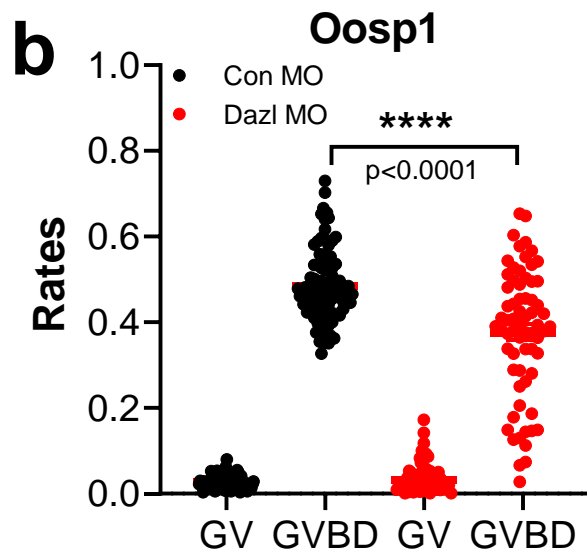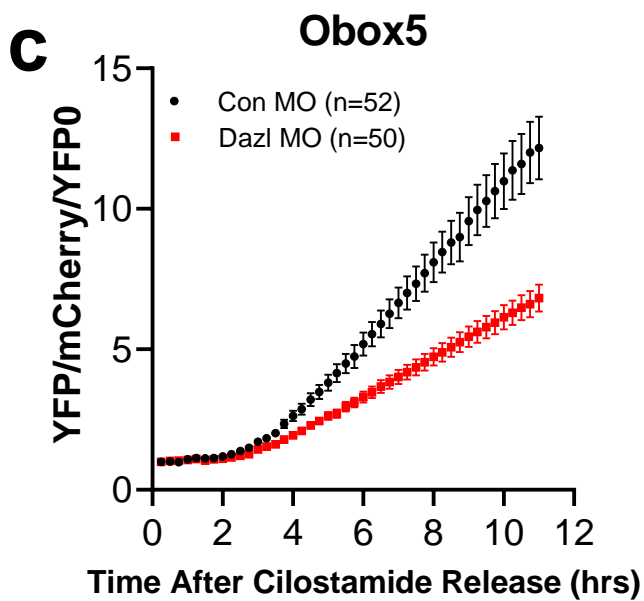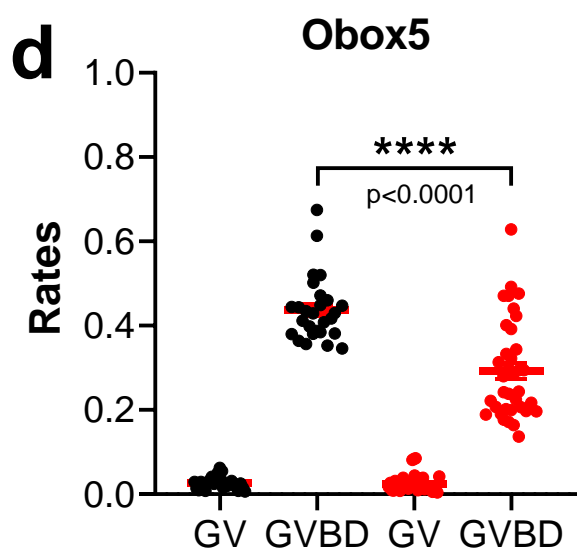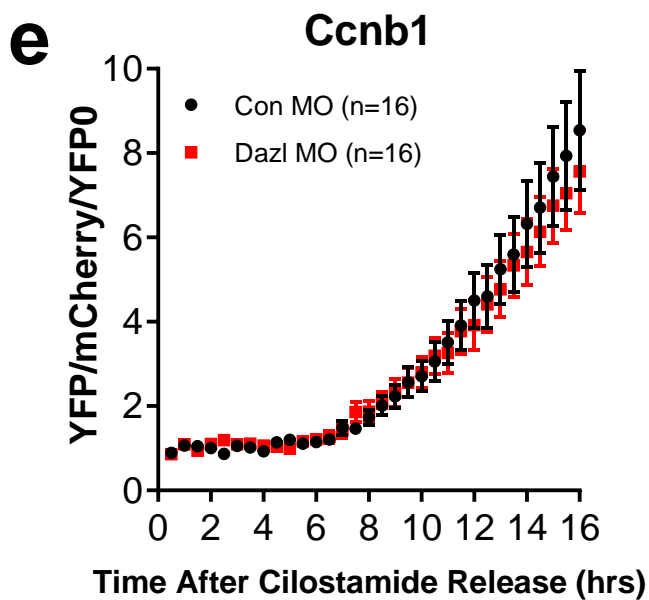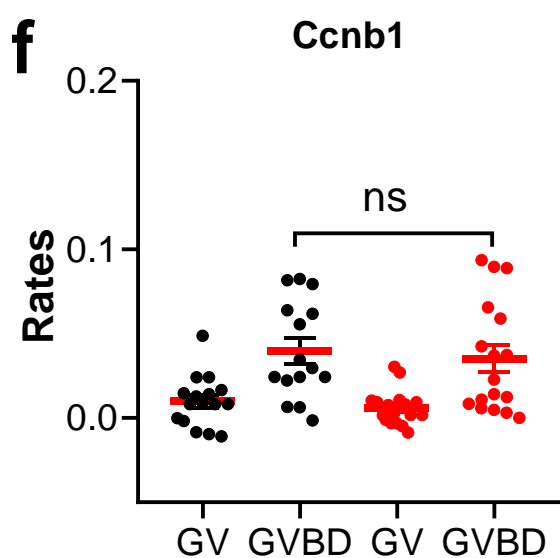

**a**

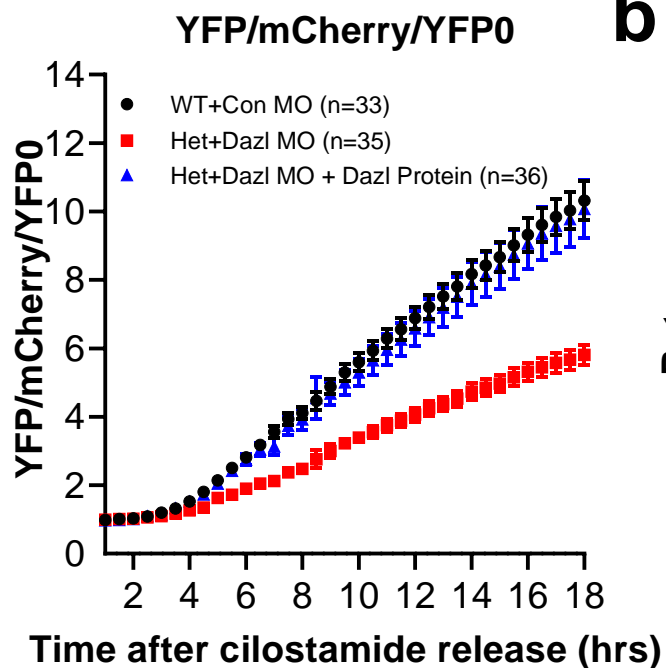

**b**

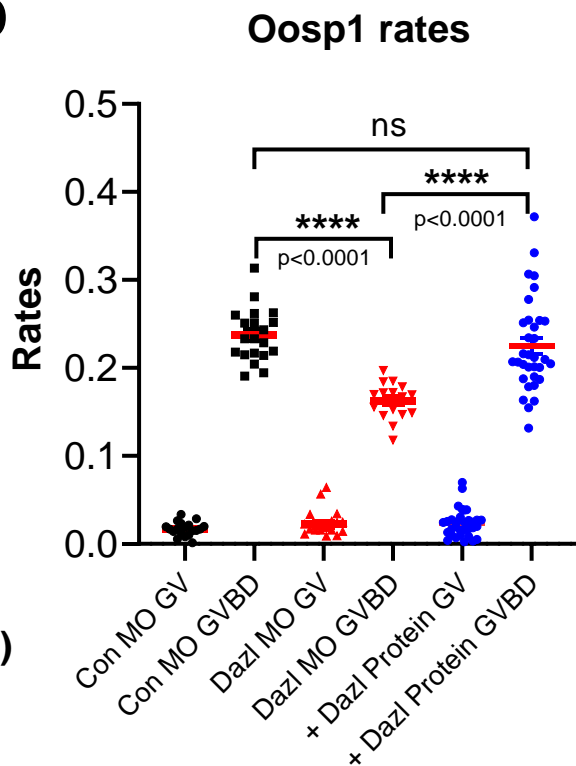

**c**

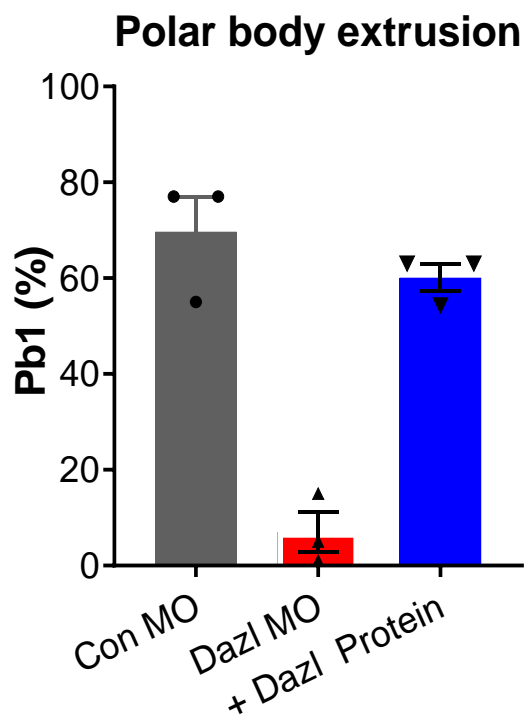

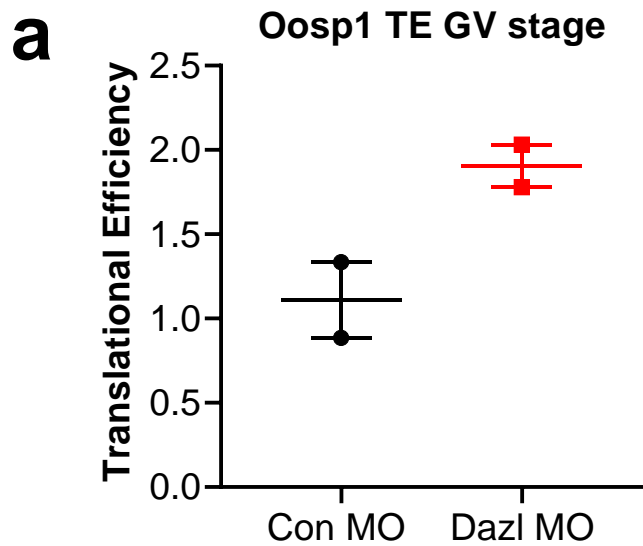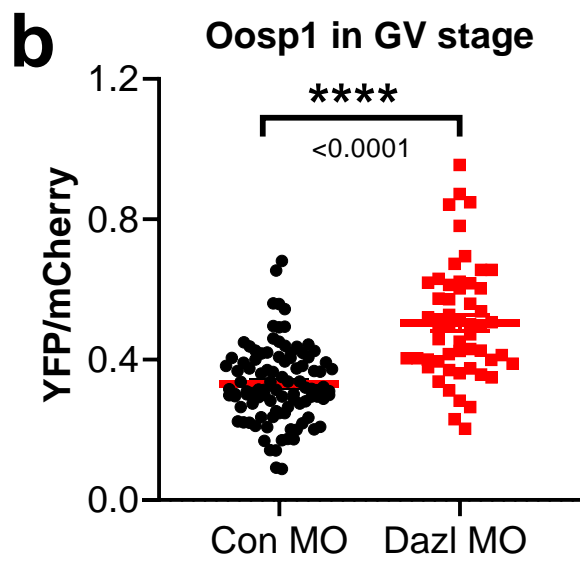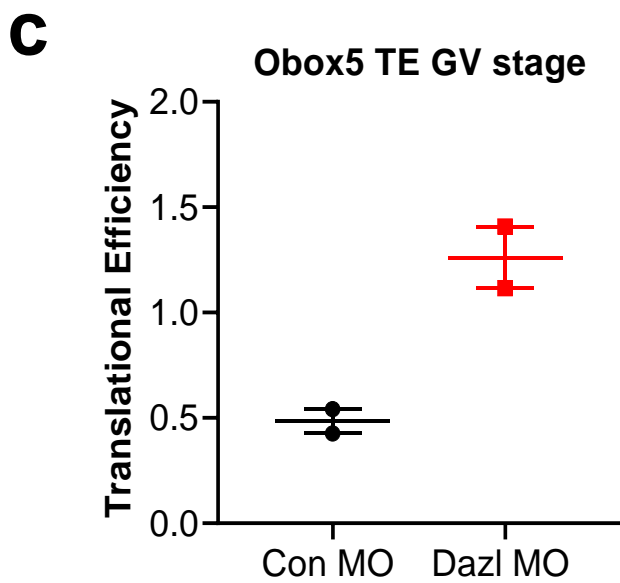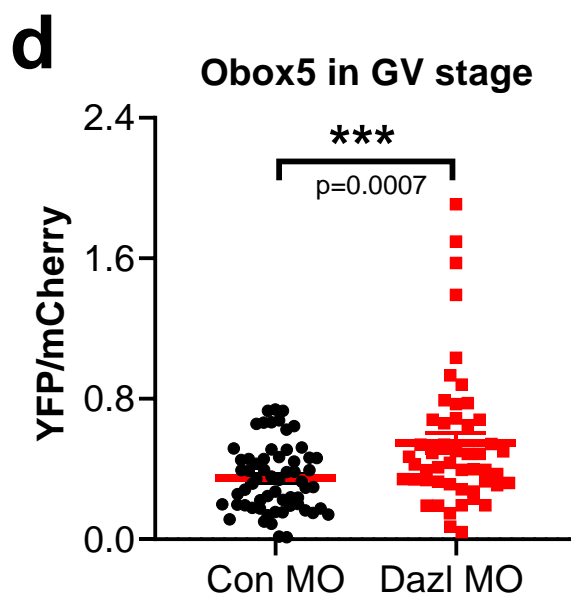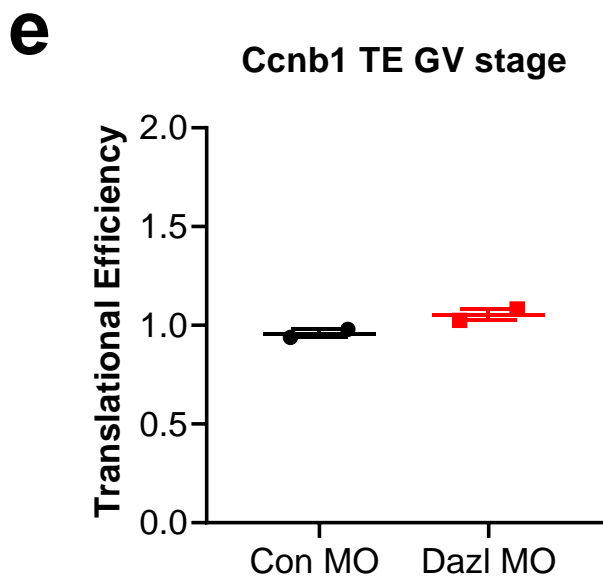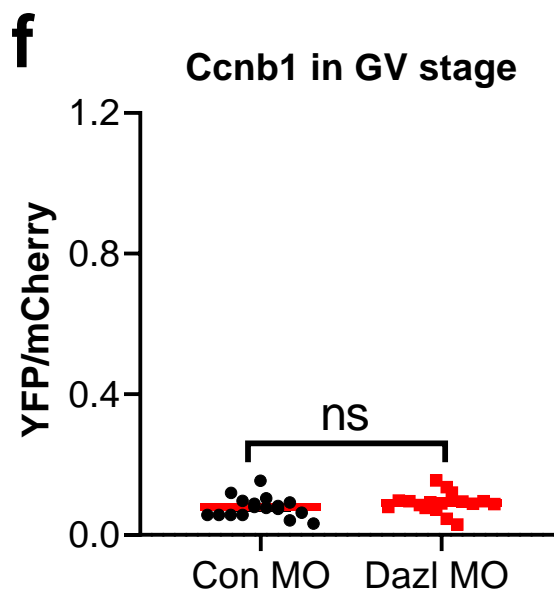

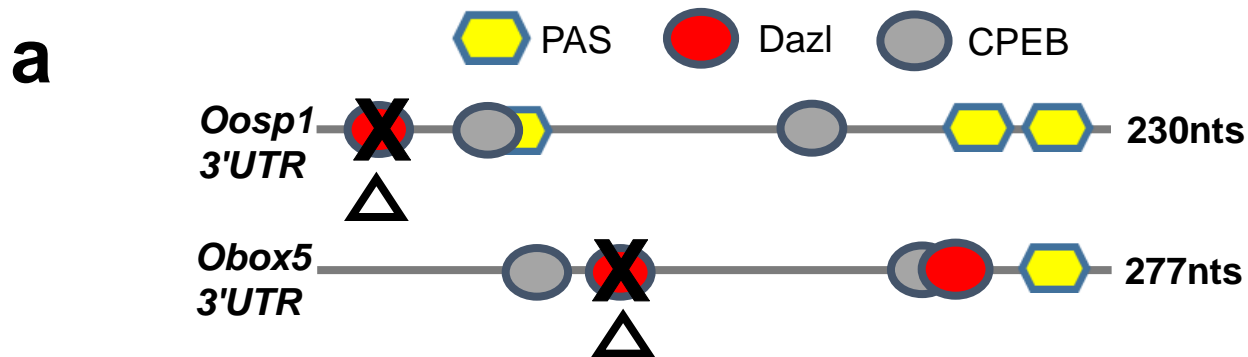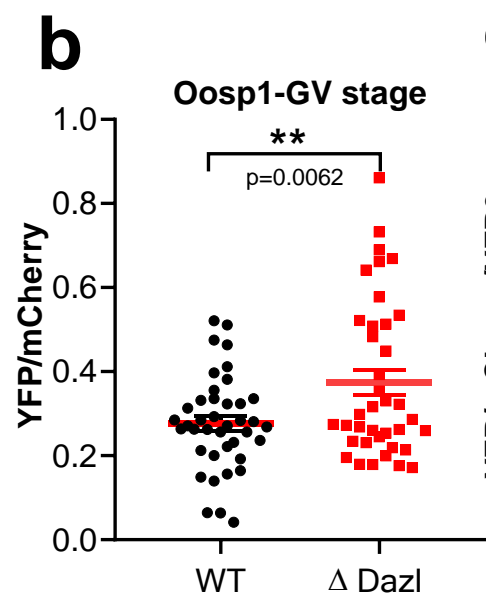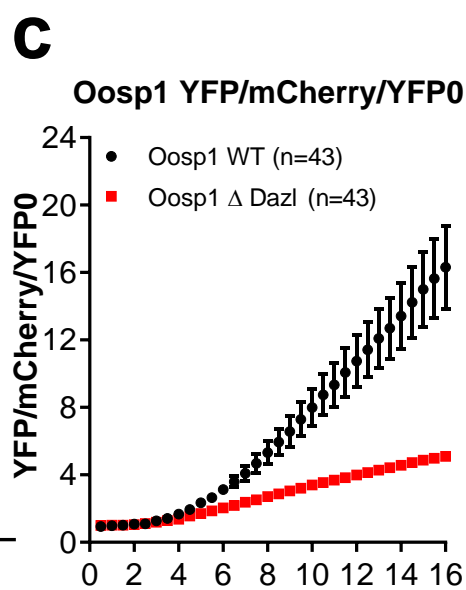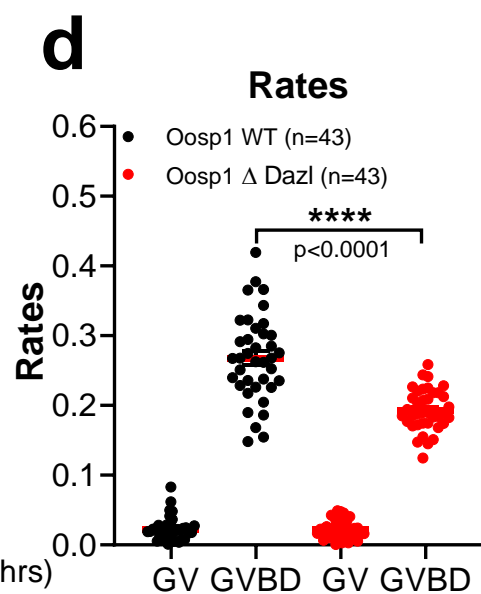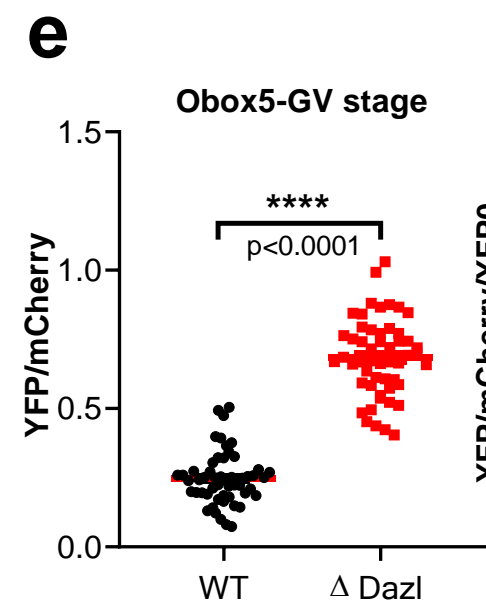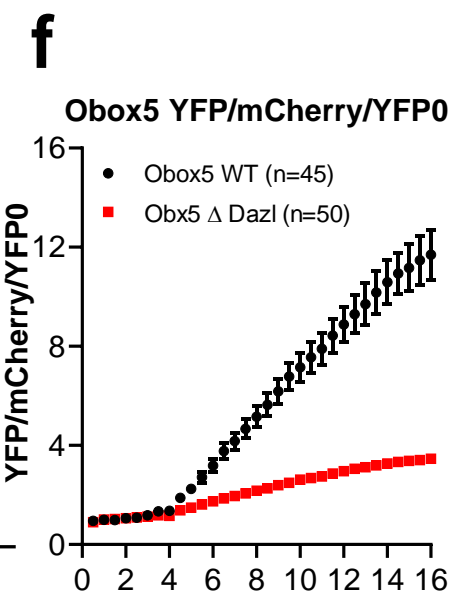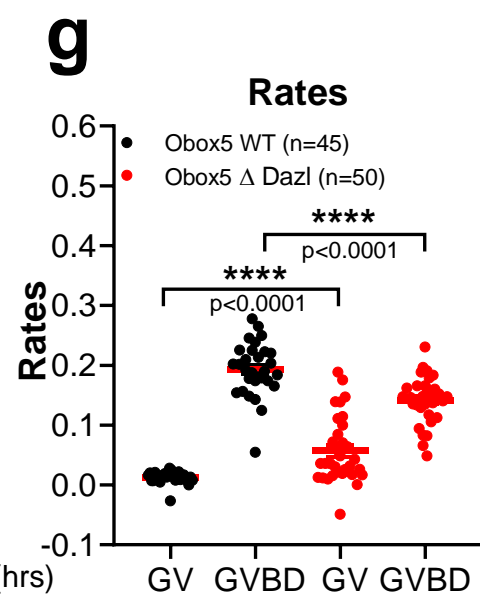

Source: https://www.biorxiv.org/content/10.1101/598805v1.full.pdf
